1 **Title Page**

2 **Title:** Evolutionary stability of collateral sensitivity to antibiotics in the model pathogen  
3 *Pseudomonas aeruginosa*

4  
5 **Authors:** Camilo Barbosa<sup>‡1</sup>, Roderich Roemhild<sup>‡1,2,3</sup>, Philip Rosenstiel<sup>4</sup>, Hinrich  
6 Schulenburg<sup>1,2\*</sup>

7 **Author Affiliation:**

8 <sup>1</sup> Department of Evolutionary Ecology and Genetics, University of Kiel, Kiel, Germany.

9 <sup>2</sup> Max-Planck-Institute for Evolutionary Biology, Ploen, Germany.

10 <sup>3</sup> Present address: Department of Medical Biochemistry and Microbiology, Uppsala  
11 University, 75123 Uppsala, Sweden

12 <sup>4</sup> Institute of Clinical Molecular Biology, UKSH, Kiel, Germany.

13 <sup>‡</sup>These authors contributed equally to this work.

14 <sup>\*</sup>Correspondence to: [hschulenburg@evolbio.mpg.de](mailto:hschulenburg@evolbio.mpg.de)

15 **Corresponding Author:**

16 Prof. Dr. Hinrich Schulenburg

17 Department of Evolutionary Ecology and Genetics

18 University of Kiel

19 24098 Kiel, Germany

20 Tel +49 431 880 4143

21 [hschulenburg@zoologie.uni-kiel.de](mailto:hschulenburg@zoologie.uni-kiel.de)

22

23 **Abstract**

24

25 Evolution is at the core of the impending antibiotic crisis. Sustainable therapy must thus  
26 account for the adaptive potential of pathogens. One option is to exploit evolutionary trade-  
27 offs, like collateral sensitivity, where evolved resistance to one antibiotic causes  
28 hypersensitivity to another one. To date, the evolutionary stability and thus clinical utility of  
29 this trade-off is unclear. We performed a critical experimental test on this key requirement,  
30 using evolution experiments with *Pseudomonas aeruginosa* combined with genomic and  
31 genetic analyses, and identified three main outcomes: (i) bacteria commonly failed to  
32 counter hypersensitivity and went extinct; (ii) hypersensitivity sometimes converted into  
33 multidrug resistance; and (iii) resistance gains occasionally caused re-sensitization to the  
34 previous drug, thereby maintaining the trade-off. Drug order affected the evolutionary  
35 outcome, most likely due to variation in fitness costs and epistasis among adaptive  
36 mutations. Our finding of robust genetic trade-offs and drug-order effects can guide design  
37 of evolution-informed antibiotic therapy.

## 38 Introduction

39

40 Treatment of infectious diseases and cancer often fail because of the rapid evolution of drug  
41 resistance (Bloemberg et al., 2015; Davies & Davies, 2010; Gottesman, 2002; Zaretsky et al.,  
42 2016). Optimal therapy should thus anticipate how resistance to treatment evolves and  
43 exploit this knowledge to improve therapy (Gatenby, Silva, Gillies, & Frieden, 2009;  
44 Imamovic & Sommer, 2013). One promising strategy is based on evolved collateral  
45 sensitivity: the evolution of resistance against one drug A concomitantly causes  
46 hypersensitivity (i.e., collateral sensitivity) to a second drug B (Szybalski & Bryson, 1952). If  
47 evolved collateral sensitivity is reciprocal, it can – in theory – trap the bacteria in a double  
48 bind, thereby preventing the emergence of multi-drug resistance during treatment (Baym,  
49 Stone, & Kishony, 2016; Pál, Papp, & Lázár, 2015; Roemhild & Schulenburg, 2019). Recent  
50 large-scale studies have demonstrated that evolved collateral sensitivity is pervasive in  
51 laboratory strains and clinical isolates of distinct bacterial species (Barbosa et al., 2017a;  
52 Imamovic et al., 2018; Imamovic & Sommer, 2013; Jansen et al., 2016; Jiao, Baym, Veres, &  
53 Kishony, 2016; Lázár et al., 2014, 2013; Oz et al., 2014; Podnecky et al., 2018) as well as  
54 cancer cells (Dhawan et al., 2017; Pluchino, Hall, Goldsborough, Callaghan, & Gottesman,  
55 2012; Shaw et al., 2015; Zhao et al., 2016). More importantly, evolved collateral sensitivity  
56 can slow down resistance evolution during combination (Barbosa, Beardmore, Schulenburg,  
57 & Jansen, 2018; Evgrafov, Gumpert, Munck, Thomsen, & Sommer, 2015; Munck, Gumpert,  
58 Wallin, Wang, & Sommer, 2014) and sequential therapy (Kim, Lieberman, & Kishony, 2014;  
59 Roemhild, Barbosa, Beardmore, Jansen, & Schulenburg, 2015), and also limit the spread of  
60 plasmid-borne resistance genes (Rosenkilde et al., 2019).

61

62 Although collateral sensitivity appears to be pervasive, its utility for medical application is  
63 still dependent on several additional factors. Firstly, the evolution of collateral sensitivity  
64 should ideally be repeatable for a given set of conditions (Nichol et al., 2019). This means  
65 that independent populations selected with the same drug should produce identical  
66 collateral effects when exposed to a second one. Such high repeatability is not always  
67 observed. Recent work even identified evolution of contrasting collateral effects (i.e., some  
68 populations with evolved collateral sensitivity and others with cross-resistance) for different  
69 bacteria, including *Pseudomonas aeruginosa* (Barbosa et al., 2017), *Escherichia coli* (Nichol et  
70 al., 2019; Oz et al., 2014), *Enterococcus faecalis* (Maltas & Wood, 2019), and a BCR-ABL  
71 leukemia cell line (Zhao et al., 2016). These patterns are likely due to the stochastic nature  
72 of mutations combined with alternative evolutionary paths to resistance against the first  
73 selective drug, subsequently causing distinct collateral effects against other drugs (Barbosa  
74 et al., 2017a; Nichol et al., 2019). Secondly, the evolution of collateral sensitivity should  
75 ideally be repeatable across conditions, for example different population sizes. This is not  
76 always the case. For example, an antibiotic pair, which consistently produced collateral  
77 sensitivity in small *Staphylococcus aureus* populations (e.g.,  $10^6$ ), instead produced complete  
78 cross-resistance in large populations (e.g.,  $10^9$ ) and thus an escape from the evolutionary  
79 constraint, most likely due to the higher likelihood of advantageous rare mutations under  
80 these conditions (Jiao et al., 2016).

81

82 A third and largely unexplored factor is that evolved collateral sensitivity and, hence, the  
83 resistance trade-off should be stable across time. This implies that bacteria either cannot  
84 evolve to overcome collateral sensitivity and thus die out, or, if they achieve resistance to  
85 the new drug B, they should concomitantly be re-sensitized to the original drug A. Two

86 recent studies, both with different main research objectives, yielded some insight into this  
87 topic. One example was focused on historical contingency during antibiotic resistance  
88 evolution of *P. aeruginosa* (Yen & Papin, 2017). As part of the results, the authors identified  
89 lineages with evolved resistance against ciprofloxacin that simultaneously showed increased  
90 sensitivity to piperacillin and tobramycin. The reverse pattern (i.e., evolved high resistance  
91 to either piperacillin or tobramycin and increased sensitivity to ciprofloxacin) was not  
92 observed and, thus, this case represents an example of uni-directional collateral sensitivity.  
93 The subsequent exposure of the ciprofloxacin-resistance lineages to either piperacillin or  
94 tobramycin led to the evolution of resistance against these two antibiotics and substantial  
95 (yet not complete) re-sensitization to ciprofloxacin. The second study focused on evolving *E.*  
96 *coli* populations in a morbidostat, in which the bacteria were exposed to repeated switches  
97 between two drugs (Yoshida et al., 2017). The evolution of multi-drug resistance was only  
98 prevented in the two treatments with polymyxin B that were also characterized by evolved  
99 collateral sensitivity, although again only in one direction (Yoshida et al., 2017). To date, the  
100 general relevance of this third factor is still unclear, especially for conditions when collateral  
101 sensitivity is reciprocal and when the evolving populations are also allowed to go extinct  
102 (i.e., they cannot overcome the evolutionary trade-off).

103  
104 Here, we specifically tested the potential of the model pathogen *P. aeruginosa* to escape  
105 reciprocal collateral sensitivity through *de novo* evolution. We focused on the first switch  
106 between two drugs, because the evolutionary dynamics after this first switch will reveal the  
107 ability of the bacteria to adapt to the second drug, against which they evolved sensitivity,  
108 and, if so, whether this causes re-sensitization to the first drug. These two aspects are key  
109 criteria for applicability of a treatment strategy that exploits evolved collateral sensitivities.  
110 Our analysis is based on a two-step evolution experiment. Bacteria first evolved resistance  
111 against a first drug A and concomitant sensitivity against a second drug B. Thereafter,  
112 bacteria were subjected to a second evolution experiment, during which they were allowed  
113 to adapt to the second drug B, either alone or additionally in the presence of the first drug A.  
114 Phenotypic characterization of the evolved bacteria was combined with genomic and  
115 functional genetic analyses, in order to determine the exact targets of selection under these  
116 conditions.

## 117 **Results**

118

119 The experimental design of our two-step evolution experiment is illustrated in Fig. 1a. We  
120 took advantage of previously evolved, highly resistant *P. aeruginosa* populations, which we  
121 obtained from serial-passage experiments with increasing concentrations of clinically  
122 relevant bactericidal antibiotics (drug A, Fig. 1a) (Barbosa et al., 2017). From these, we  
123 identified two cases of reciprocal collateral sensitivity, including (i) piperacillin/tazobactam  
124 (PIT) and streptomycin (STR), or (ii) carbenicillin (CAR) and gentamicin (GEN). In the current  
125 study, we now re-assessed the reciprocity of collateral effects using dose-response analysis  
126 (Fig. 1b and c – Source Data 1). Thereafter, we isolated resistant colonies from these  
127 populations and switched treatment to the drug, against which collateral sensitivity was  
128 observed (drug B, Fig. 1a). The evolutionary challenge was initiated at sub-inhibitory  
129 concentrations of each drug (vertical black dashed lines in Fig. 1b and c), followed by linear  
130 concentration increases at two different rates: mild or strong (vertical orange and blue  
131 dashed lines respectively, Fig. 1b and c). We specifically chose linear increases, because our  
132 main objective was to better understand the evolutionary dynamics occurring during the  
133 first switch of a collateral sensitivity cycling strategy. Linear increases would, in this case,  
134 facilitate evolutionary rescue and provide ample opportunity to escape the double bind,  
135 thereby yielding a conservative measure for the applicability of collateral sensitivity as a  
136 treatment strategy. We additionally considered treatments where antibiotics were also  
137 switched to collateral sensitivity, but selection by drug A was continued in combination with  
138 drug B; hereby denoted as constrained environments. Overall, four selective conditions were  
139 run in parallel: mild or strong increases of the second drug B in either the presence  
140 (constrained) or absence (unconstrained) of the first drug A (Fig. 1a). We further included  
141 control experiments without antibiotics. To determine treatment success, we monitored  
142 bacterial growth with continuous absorbance measurements, quantified frequencies of  
143 population extinction, and characterized changes in antibiotic resistance of the evolved  
144 bacteria as previously evaluated for *P. aeruginosa* and other bacteria (Barbosa et al., 2018,  
145 2017; Hegreiness, Shores, Damian, Hartl, & Kishony, 2008).

146

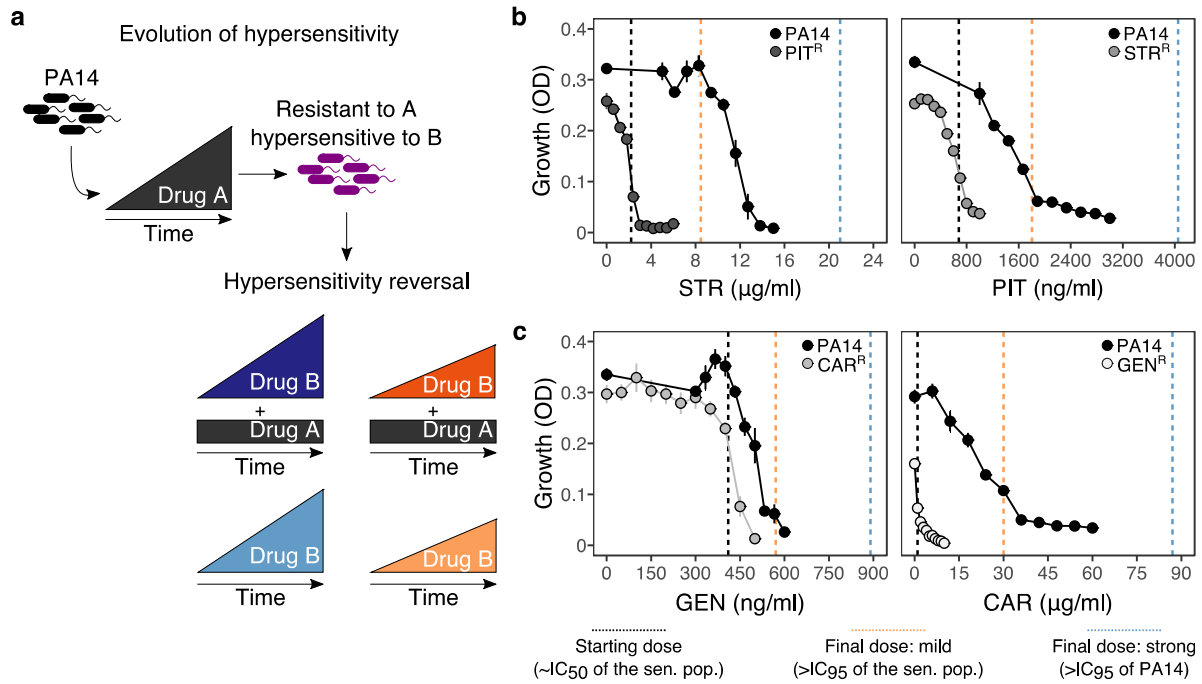

147  
148  
149 **Figure 1. Reciprocal collateral sensitivity and experimental design.** **a**, Two-step experimental evolution:  
150 resistant populations of *P. aeruginosa* PA14 were previously experimentally evolved (Barbosa et al., 2017)  
151 with increasing concentrations of a particular drug (here labelled A), resulting in bacteria becoming hypersensitive  
152 to other drugs (here labelled B). In a second step, resistant clones were experimentally evolved in the presence  
153 of drug B, using four selection regimes: (i) strong dose increase of drug B in the presence of a constant high  
154 dose of drug A; (ii) mild dose increase of B in the presence of A; (iii) strong dose increases of B in the absence  
155 of A; and (iv) mild dose increase of B in the absence of A. Concentrations of B were increased using linear ramps  
156 starting at IC<sub>50</sub> (dashed black lines) and ending at levels above the IC<sub>95</sub> of the collaterally sensitive clone (mild  
157 increases, dashed orange line), or that of the PA14 wildtype strain (strong increases, dashed black lines;  
158 detailed information on concentrations in Supplementary Table 1). **b**, Validated reciprocity of collateral  
159 sensitivity for the isolated resistant clones and drug pair PIT/STR, and **c**, CAR/GEN. Mean  $\pm$  CI95, n=8. CAR,  
160 carbenicillin; GEN, gentamicin; STR, streptomycin; PIT, piperacillin with tazobactam; superscript R denotes  
161 resistance against the particular drug. Vertical dashed lines indicate the starting (black) and final doses of the  
162 mild (light orange) and strong drug increases (light blue).

### 164 Extinction rates were high even under mild selection regimes.

165 The imposed antibiotic selection frequently caused population extinction (Fig. 2 – Source  
166 Data 2), even though sublethal drug concentrations were used. Extinction events occurred  
167 significantly more often when selection for the original resistance was maintained by the  
168 presence of both drugs (extinction in constrained treatments vs. only one drug,  $\chi^2=12.9$ ,  
169  $df=1$ ,  $P<0.0001$ ; Fig. 2). In treatments with only the second drug B, extinction occurred  
170 significantly more often under strong, but not mild concentration increases (strong vs. mild  
171 increases in unconstrained environments,  $\chi^2=5.5$ ,  $df=1$ ,  $P=0.019$ ). Drug switches with the  
172 antibiotic pair STR/PIT was particularly successful, with 33 extinction events (~51%, Fig. 2).  
173 The results differed for the CAR/GEN pair, which produced only 7 extinctions (~10%), all  
174 restricted to one drug order, GEN->CAR, suggesting asymmetry in the ability to counter  
175 collateral sensitivity. From this, we conclude that strong genetic constraints against an  
176 evolutionary response to collateral sensitivity caused frequent population extinctions for  
177 STR/PIT switches, whereas evolutionary rescue was possible for the GEN/CAR pair, although  
178 influenced by drug identity and order.  
179

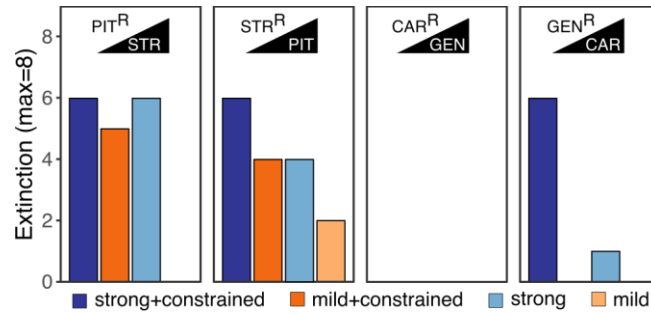

180  
181  
182 **Figure 2. Extinction events during second step of experimental evolution.** From left to right, extinction events  
183 for PIT<sup>R</sup>-populations adapting to STR, STR<sup>R</sup>-populations adapting to PIT, CAR<sup>R</sup>-populations adapting to GEN, and  
184 GEN<sup>R</sup>-populations adapting to CAR. Superscript R indicates resistance against the particular antibiotic, as  
185 evolved during the first step of the evolution experiment.

186  
187

### Novel resistance evolved rapidly in many of the surviving populations.

188 We subsequently focused our analysis of the evolutionary dynamics on the surviving  
189 populations of the CAR/GEN pair and identified rapid adaptive responses, especially when  
190 not constrained by the presence of the two drugs (Fig. 3). This analysis was not possible for  
191 the STR/PIT pair, because few populations survived treatment. For the CAR/GEN pair, we  
192 measured bacterial adaptation using relative biomass (see methods and Roemhild et al.,  
193 2018) and found it to have increased in all surviving populations (Fig. 3a and b – Source Data  
194 3). For both drug orders, the increase was significantly slower in the constrained treatments,  
195 and, to a lesser extent, for the strong concentration increases (Fig. 3a and b, Supplementary  
196 Table 2). In consistency with the asymmetry in extinction, the CAR->GEN switch (with no  
197 extinction) maintained a high relative biomass across time, while the reverse direction GEN-  
198 >CAR (with extinction) produced lower relative biomass levels. These results indicate that *P.*  
199 *aeruginosa* can evolve resistance against a drug, to which it had previously shown  
200 hypersensitivity, and that such evolutionary rescue is favored for the suboptimal switch. We  
201 next asked how the new adaptation influenced the original drug resistances.

202

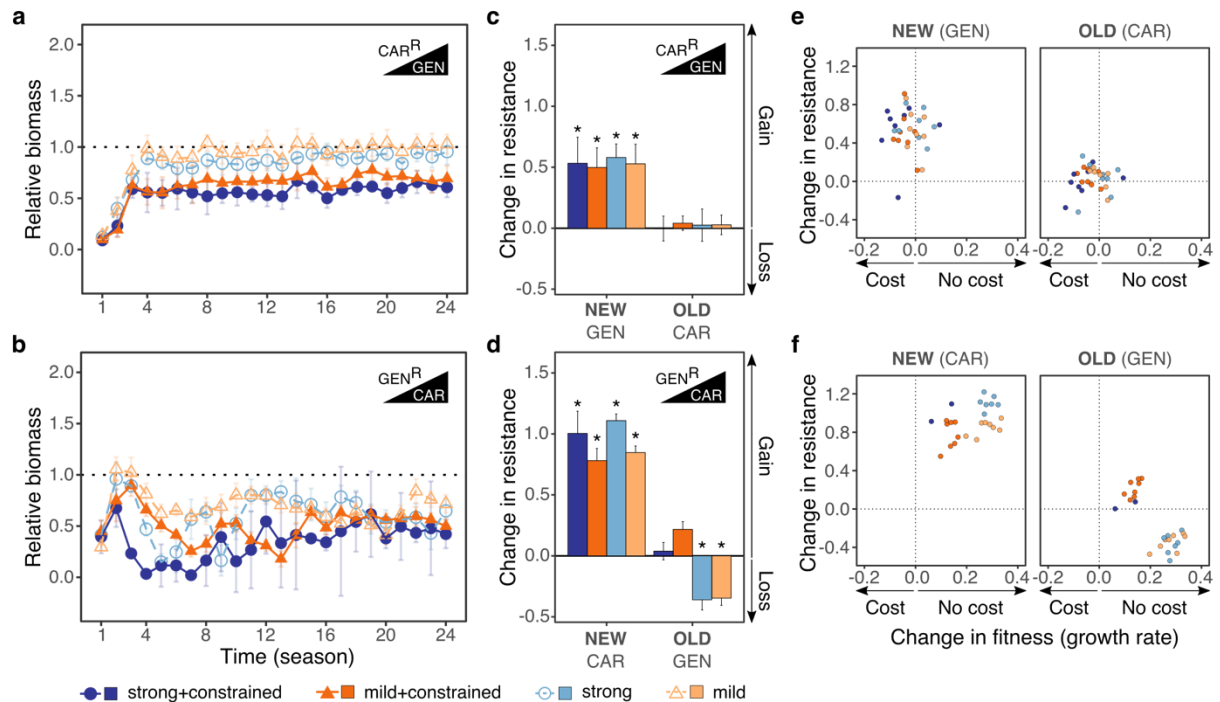

203

204 **Figure 3. Contrasting evolutionary stability of collateral sensitivity for CAR->GEN and GEN->CAR switches.**  
205 Evolutionary dynamics of surviving populations expressed as relative biomass for **a**, CAR<sup>R</sup>-populations during  
206 selection with GEN, and **b**, GEN<sup>R</sup>-populations during selection with CAR. The dotted horizontal line indicates  
207 growth equal to untreated controls. Mean  $\pm$  CI95, number of biological replicates differs due to extinction  
208 (min=2, max=8). Changes in antibiotic resistance at the end of the second-step evolution experiment for **c**,  
209 CAR<sup>R</sup>-populations after selection with GEN and **d**, GEN<sup>R</sup>-populations after selection with CAR. Resistance was  
210 tested either against the drug towards which bacteria initially expressed resistance after the first evolution  
211 experiment (indicated as OLD), or the drug used during the second experiment (indicated as NEW). The change  
212 is measured by cumulative differences in dose-response before and after the second evolution experiment (i.e.,  
213 the original antibiotic resistant clone *versus* its evolved descendants). Mean  $\pm$  CI95, n = 2-8 biological replicates  
214 (differences due to extinction). Asterisks indicate significant changes in resistance (one-sample *t*-test,  $\mu=0$ , FDR-  
215 adjusted probabilities). Correlation between fitness and resistance changes for **e**, CAR<sup>R</sup>->GEN-lineages and, **f**,  
216 GEN<sup>R</sup>->CAR-lineages. The change in fitness (X-axis) is inferred from the growth rate under no-drug conditions of  
217 the evolved population at the end of the second evolution experiment relative to that of the respective starting  
218 clone, derived from the first evolution experiment (obtained from Barbosa et al., 2017). The corresponding  
219 changes in resistance are as shown in c and d. CAR, carbenicillin; GEN, gentamicin; superscript R denotes  
220 resistance. Superscript R denotes resistance against the particular drug.

221  
222

### 223 **Drug order determined re-sensitization or emergence of multidrug resistance.**

224 Adaptation in the surviving populations of the CAR/GEN pair caused multidrug resistance in  
225 the suboptimal switch, but re-sensitization to similar levels than the PA14 ancestor  
226 (Supplementary Fig. 1 – Source Data 4 and 5) in the alternative switch (Fig. 3c and d – Source  
227 Data 6). In detail, all surviving populations significantly increased resistance against the  
228 second drug (Fig. 3c and d; Supplementary Table 3) – in agreement with the recorded  
229 biomass dynamics. In the suboptimal switch, CAR->GEN, all populations maintained their  
230 original resistance, thereby yielding bacteria with multidrug resistance. This was different for  
231 the alternative direction GEN->CAR, where the original resistance was only maintained when  
232 both drugs were present in combination (constrained environments). Only under  
233 unconstrained evolution, we observed cases of significant re-sensitization to the first drug.  
234 We conclude that drug order can determine treatment efficacy, enhance or minimize  
235 multidrug resistance, and, in specific cases, lead to a re-sensitization towards the first drug in  
236 the surviving populations, as required for applicability of collateral sensitivity cycling  
237 (Imamovic & Sommer, 2013).

238  
239 We hypothesized that the contrasting evolutionary outcomes in constrained *versus*  
240 unconstrained treatments of the GEN->CAR switch were caused by an additional trade-off, in  
241 this case between drug resistance and growth rate. The starting clones for the second  
242 evolution experiment had significantly impaired growth rate and final yield under drug-free  
243 conditions, with respectively ~25-50% and 10-50% reductions in fitness relative to the  
244 ancestor (Barbosa et al., 2017). As a consequence, selection may have favored variants with  
245 higher growth rates. For this particular switch, we indeed found increased growth relative to  
246 the resistant ancestral clone for all treatments. The growth rate increases were significantly  
247 larger in lineages from unconstrained than constrained treatments (Fig. 3f – Source Data 7,  
248 Supplementary Fig. 2 – Source Data 7). In this case, resistance levels also increased slightly  
249 (but not significantly) for the unconstrained compared to the constrained treatments  
250 (Supplementary Table 4). Similar variations were not observed for the alternative switch  
251 CAR->GEN (Fig. 3e – Source Data 7, Supplementary Fig. 2, Supplementary Table 4). We  
252 conclude that re-sensitization was favored over multidrug resistance in the GEN->CAR  
253 unconstrained treatments, because it provided the advantage of increases in growth rate



254 and, to a lesser extent, resistance to the new drug. This data suggests that fitness costs can  
255 determine treatment outcome upon collateral sensitivity switches.

256

### 257 **Whole genome sequencing identified possible targets of antibiotic selection.**

258 We used population genomic analysis to characterize specific functional changes that were  
259 likely targeted by antibiotic selection and allowed populations to survive the second  
260 evolution experiment for the CAR/GEN pair (Fig. 4 – Source Data 8). In particular, we  
261 sequenced whole genomes of the resistant starting clones from the beginning and 21  
262 surviving populations from the end of the second evolution experiment. The evolution of  
263 multidrug resistance in the suboptimal switch CAR->GEN can be explained by the sequential  
264 fixation of mutations including, under unconstrained conditions, those in *ptsP* (Fig. 4a –  
265 Source Data 6), a main component of the global regulatory system of ABC transporters and  
266 other virulence factors (Feinbaum et al., 2012). Similarly, under constrained conditions, we  
267 found mutations in the NADH-dehydrogenase genes *nuoD* or *nuoG* (Fig. 4a), which are  
268 known to influence proton motive force and resistance against aminoglycosides upon  
269 inactivation (El'Garch, Jeannot, Hocquet, Llanes-Barakat, & Plésiat, 2007).

270

271 For the more effective switch GEN->CAR, multidrug resistance in the constrained treatments  
272 coincided with mutations in *mexR*, *phoQ*, and *cpxS*, an independent regulator of MexAB-  
273 OprM (X.-Z. Li, Elkins, & Zgurskaya, 2016) and two-component regulators involved in  
274 aminoglycoside resistance (Gooderham & Hancock, 2009) and envelope stress response  
275 (Roemhild et al., 2018), respectively. The re-sensitization towards the first drug in the  
276 unconstrained GEN->CAR treatments was associated with two main types of mutational  
277 changes at high frequencies across several replicates, including (i) mutations in *nalC* and  
278 *nalD* that upregulate the expression of the multidrug-efflux system MexAB-OprM in *P.*  
279 *aeruginosa* (X.-Z. Li et al., 2016); and (ii) large deletions in *pmrB*, which is part of a two-  
280 component regulatory system (Fig. 4b – Source Data 6). Mutations in *nalC* were previously  
281 shown to mediate both resistance to CAR and hypersensitivity to GEN (Barbosa et al., 2017).  
282 Thus, re-sensitization to GEN may be caused by antagonistic pleiotropy of *nalC* mutations  
283 that override the resistance of the original *pmrB* mutation (Source Data 8). In addition, there  
284 may be epistasis between the two functional modules. A complementary mechanism for re-  
285 sensitization against GEN is the re-mutation of *pmrB* (Source Data 8). In three cases *nalC*  
286 mutations coincided with mutations in *pmrB*, including two deletions of 17 and 225 base  
287 pairs. Whilst the original SNP in *pmrB* altered gene function, the latter deletions may have  
288 suppressed the expression of the original SNP by pseudogenizing the gene. We conclude that  
289 mutations in the *nalC* or *nalD* regulators of the MexAB-OprM pump, sometimes in  
290 combination with follow up mutations in *pmrB* are likely to account for the re-sensitization  
291 towards the first drug GEN.

292

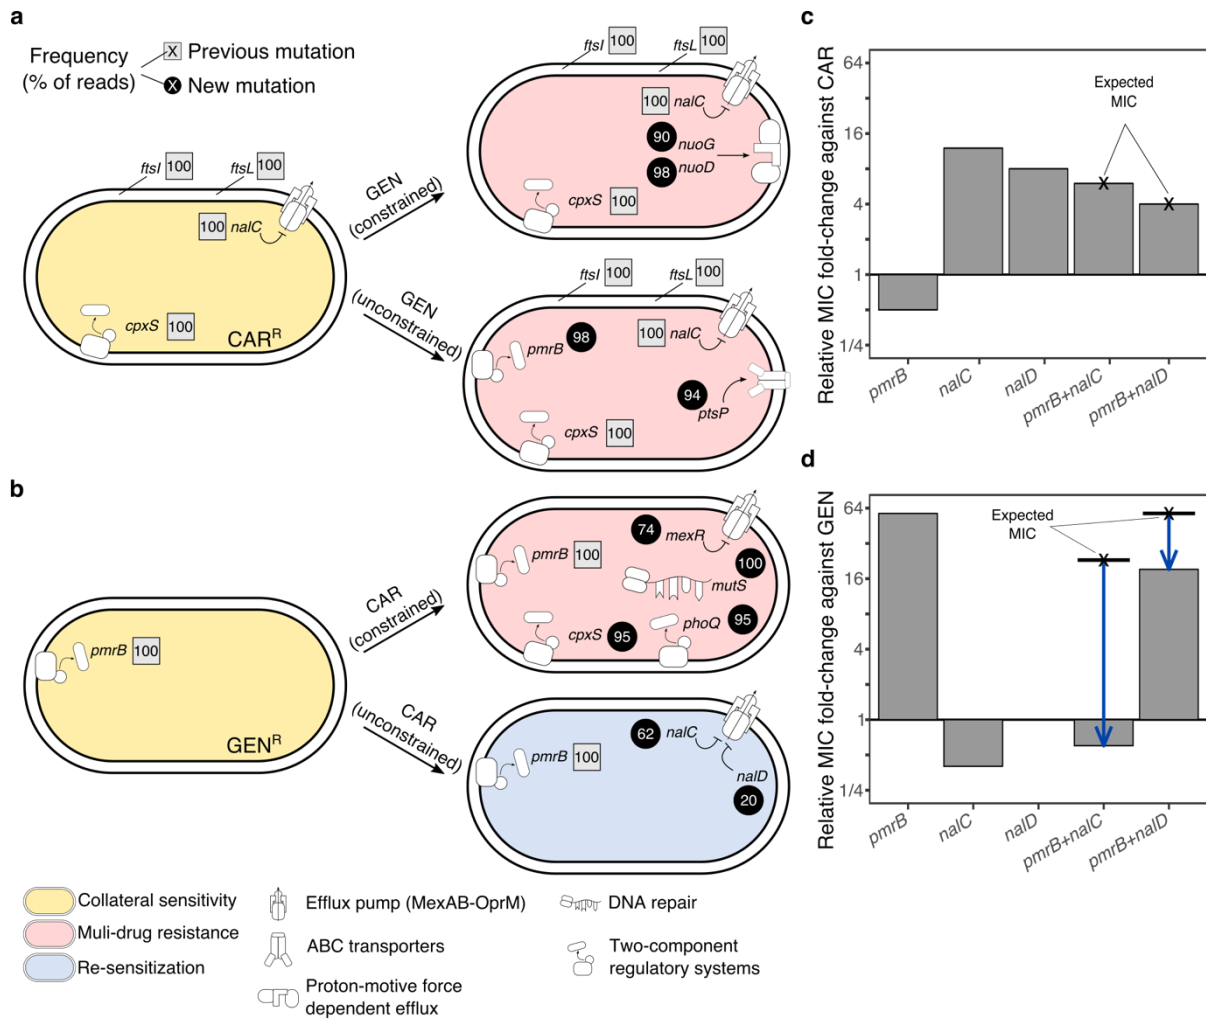

293  
294  
295 **Figure 4. Genomics of experimental evolution for the CAR/GEN drug pair.** **a**, Most relevant genomic changes  
296 in CAR-resistant populations selected with GEN, and **b**, GEN-resistant populations selected with CAR. Square  
297 symbols next to gene names indicate ancestral resistance mutations (obtained from Barbosa et al., 2017), and  
298 circles indicate newly acquired mutations. The numbers inside these symbols indicate variant frequencies (as  
299 inferred by the percentage of reads in population genomics data) and correspond to the lowest frequency  
300 found among the sequenced populations from the respective treatment. The evolved resistance phenotype is  
301 highlighted by color shading (see legend in bottom left). All mutations are listed in Source Data 8. **c**, MIC  
302 relative to PA14 against CAR and **d**, GEN, of single and double mutant strains. The cross and bold horizontal line  
303 indicates the MIC as expected by the individual effects. Blue arrows highlight epistatic effects.

304  
305 **Functional genetic analysis revealed asymmetric epistasis among adaptive mutations.**

306 We next investigated whether epistasis between the two functional modules of efflux  
307 regulation (MexAB-OprM regulation by *nalC* or *nalD*) and surface charge modification (*pmrB*)  
308 may have contributed to re-sensitization using functional genetic analysis. The respective  
309 single and double mutations were re-constructed in the common ancestral background of  
310 PA14 (see methods for the specific mutations) and changes in resistance against CAR and  
311 GEN were measured using fold change of minimal inhibitory concentrations (MIC, Fig. 4c and  
312 d – Source Data 9). On CAR, the *pmrB* mutant had half of the MIC of PA14 (confirming  
313 collateral sensitivity), whilst *nalC* and *nalD* mutants had increased resistance to CAR. The  
314 double mutants had lower MIC on CAR than the *nalC* and *nalD* single mutants (Fig. 4c). The  
315 extent of MIC changes in the double mutants corresponded to the product of the individual  
316 effects in the respective single mutants, thus indicating an additive interaction among

317 mutations on CAR. On GEN, however, the double mutants had substantially lower MICs than  
318 expected from the single mutants (Fig. 4d), strongly suggesting negative epistasis. In detail,  
319 GEN-resistance relative to PA14 was 0.4x for *nalC* (collateral sensitivity), 1x for *nalD*, and 57x  
320 for *pmrB* (Fig. 4d). The *pmrB*, *nalD* double mutant had 3x lower MIC to GEN than expected  
321 from the individual effects. The *pmrB*, *nalC* double mutant had >30x lower MIC to GEN than  
322 expected from the individual effects, resulting in greater sensitivity than PA14 (Fig. 4d).  
323 Altogether, we conclude that re-sensitization to GEN is mediated by antagonistic pleiotropy  
324 and negative epistasis.  
325  
326

## 327 Discussion

328

329 Collateral sensitivity is a pervasive feature of resistance evolution, but its potential for  
330 medical application is currently debated (Nichol et al., 2019; Podnecky et al., 2018; Roemhild  
331 & Schulenburg, 2019). Its promise as a treatment focus is that the exploited trade-off is  
332 evolutionarily stable and cannot be easily overcome. As a consequence, it should either drive  
333 bacterial populations to extinction or minimize the emergence of multi-drug resistance by  
334 re-sensitization to one of the antibiotics. We here tested the validity of these key  
335 assumptions with the help of evolution experiments and the model pathogen *P. aeruginosa*.  
336 We found that the effective exploitation of evolved collateral sensitivity in sequential  
337 therapy is contingent on drug order and combination, fitness costs, and also epistatic genetic  
338 interactions (Supplementary Fig. 3).

339

340 Evolved reciprocal collateral sensitivity generally limited bacterial adaptation. The effect was  
341 strongest when the first antibiotic was maintained and a second was added, as reflected by  
342 the elevated extinction rates in the constrained environments. This finding may point to a  
343 promising, yet currently unexplored treatment strategy, namely single-drug therapy  
344 followed by combination therapy, that can maximize exploitation of the evolutionary trade-  
345 off. Yet, extinction rates were even high under unconstrained conditions, when drugs were  
346 replaced, and in spite of a relatively mild selection intensity, for example an increase in drug  
347 concentration from  $IC_{50}$  to  $IC_{95}$  over a course of 12 days. We observed higher extinction and  
348 slower growth improvements in strong, compared to mild drug increases. This finding is  
349 generally consistent with previous studies, performed in different context, in which  
350 narrowed mutation space upon fast environmental deterioration increased extinction  
351 frequencies (Bell & Gonzalez, 2011; Lindsey, Gallie, Taylor, & Kerr, 2013). Interestingly,  
352 extinction rates are often not reported as an evolutionary outcome in related studies,  
353 possibly because of a different main focus of the study (Yen & Papin, 2017), or because  
354 extinction could not be recorded due to the particular experimental set-up (i.e., usage of a  
355 morbidostat; Yoshida et al., 2017)). Considering that antimicrobial therapy usually aims at  
356 elimination of bacterial pathogens and extinction frequencies are known from previous  
357 evolution experiments to vary among treatment types (Barbosa et al., 2018; Hansen, Woods,  
358 & Read, 2017; Roemhild et al., 2018; Torella, Chait, & Kishony, 2010), their consideration  
359 should help us to refine our understanding of treatment efficacy.

360

361 In the treatments that replaced drugs, evolutionary stability of the resistance trade-off was  
362 determined by drug order. Our results for the CAR/GEN pair suggest that this asymmetric  
363 stability was determined by variation in either the extent of hypersensitivity and/or the  
364 associated physiological fitness costs. The extent of hypersensitivity of the GEN-resistant  
365 strain towards CAR was substantially larger than that of the reverse case (Fig. 1c). A similar  
366 difference was observed for fitness costs under antibiotic free conditions (see bacterial yield  
367 in the no-drug environment on the far left in Fig. 1b and c). It is indeed the GEN->CAR switch  
368 (rather than the reciprocal CAR->GEN switch) that produced higher extinction levels (Fig. 2),  
369 lower adaptation rates (Fig. 3a and b), and a re-sensitization in the surviving populations  
370 (Fig. 3c and d). We conclude that, if the degree of hypersensitivity and/or fitness costs is  
371 large, it may be more difficult to counter the strong growth restriction in the presence of the  
372 second drug within a limited time frame.

373

374 Drug re-sensitization in the unconstrained treatment of GEN->CAR was likely dependent on  
375 negative epistasis among pleiotropic resistance mutations. In particular, we found that  
376 mutations in *pmrB* and the efflux regulators *nalC* and *nalD* interacted negatively with each  
377 other and caused a complete re-sensitization of bacteria that were previously resistant  
378 against GEN. While re-sensitization reliably occurred for the GEN->CAR treatment, it did not  
379 occur in the reverse case. Similar examples of antibiotic re-sensitization were previously  
380 reported for *E. coli* and *P. aeruginosa*, but these relied on different mechanisms. For *E. coli*,  
381 repeated alternation between two antibiotics led to re-sensitization as a consequence of  
382 clonal interference between variants in two genes, *secD* and/or *basB*. The change between  
383 drugs prevented fixation of the competing variants, thus maintaining pleiotropic alleles and  
384 thereby the allele causing resistance to one drug and hypersensitivity to the other (Yoshida  
385 et al., 2017). In the previous example for *P. aeruginosa*, hypersensitivity to a  $\beta$ -lactam  
386 depended on an expression imbalance of the MexAB-OprM and the MexEF-OprN efflux  
387 systems after exposure to a fluoroquinolone (Maseda et al., 2004; Sobel, Neshat, & Poole,  
388 2005; Yen & Papin, 2017). Interestingly, partial re-sensitization against the aminoglycoside  
389 tobramycin was dependent on adaptive resistance, a phenomenon mediated by the MexXY-  
390 OprM efflux pump, whereby expression, and consequently resistance, is induced by the  
391 presence of the drug, but then reverted after its removal (Hocquet et al., 2003; Yen & Papin,  
392 2017). We conclude that our finding of negative epistasis between pleiotropic resistance  
393 mutations is a previously unknown mechanism underlying re-sensitization. Whilst positive  
394 epistasis can substantially amplify resistance gains (Wistrand-Yuen et al., 2018), negative  
395 epistasis can limit evolutionary trajectories (Weinreich, Delaney, Depristo, & Hartl, 2006),  
396 thus possibly contributing to efficacy of treatment in our case.

397  
398 We anticipate that the findings of our study could help to guide the design of sustainable  
399 antibiotic therapy that controls the infection, whilst reducing the emergence of multidrug  
400 resistance. The refined exploitation of collateral sensitivity represents a promising addition  
401 to new evolution-informed treatment strategies, including as alternatives specific  
402 combination treatments (Barbosa et al., 2018; Chait, Craney, & Kishony, 2007; Evgrafov et  
403 al., 2015; Gonzales et al., 2015; Munck et al., 2014), fast sequential therapy (Nichol et al.,  
404 2015; Yoshida et al., 2017), or treatments utilizing negative hysteresis (Roemhild et al.,  
405 2018).  
406

407  
408  
409  
410  
411  
412  
413  
414  
415  
416  
417  
418  
419  
420  
421  
422  
423  
424  
425  
426  
427  
428  
429  
430  
431  
432  
433  
434  
435  
436  
437  
438  
439  
440  
441  
442  
443  
444  
445  
446  
447  
448  
449  
450  
451  
452  
453  
454

## Methods

**Material.** All experiments were performed with *P. aeruginosa* UCBPP-PA14 (Rahme et al., 1995) and clones obtained from four antibiotic-resistant populations: *CAR-10*, *GEN-4*, *PIT-1* and *STR-2* (Barbosa et al., 2017). The resistant populations were previously selected for high levels of resistance against protein synthesis inhibitors from the aminoglycoside family, gentamicin (GEN; Carl Roth, Germany; Ref. HN09.1) and streptomycin (STR; Sigma-Aldrich, USA; Ref. S6501-5G), or alternatively cell-wall synthesis inhibitors from the  $\beta$ -lactam family, carbenicillin (CAR; Carl Roth, Germany; Ref. 6344.2) and piperacillin/tazobactam (PIT; Sigma-Aldrich, USA; Refs. P8396-1G and T2820-10MG). Resistant clones were isolated by streaking the resistant populations on LB agar plates supplemented with antibiotics and picking single colonies after an overnight growth at 37°C. Antibiotic stocks were prepared according to manufacturer instructions and frozen in aliquots for single use. Evolution experiments and resistance measurements were performed in liquid M9 minimal media supplemented with glucose (2 g/l), citrate (0.5 g/l) and casamino acids (1 g/l).

**Measurements of reciprocal collateral sensitivity.** The previously reported collateral sensitivity trade-off (Barbosa et al., 2017) was confirmed for this study, by measuring sensitivity of the resistant populations *CAR-10* to GEN, *GEN-4* to CAR, *PIT-1* to STR, and *STR-2* to PIT, in comparison to PA14. Populations were grown to exponential phase, standardized by optical density at 600 nm ( $OD_{600} = 0.08$ ), and inoculated into 96-well plates (100  $\mu$ l volumes,  $5 \times 10^6$  CFU/ml) containing linear concentrations of antibiotics (10 concentrations, 8 replicates each). Antibiotic concentrations were spatially randomized. Plates were incubated at 37°C for 12 h, after which growth was measured by  $OD_{600}$  with a BioTek plate reader.

**Experimental evolution.** To test the evolutionary stability of reciprocal collateral sensitivity, we challenged clones from previously evolved resistant populations with increasing concentrations of new antibiotics against which the resistant populations showed hypersensitivity (so called collateral sensitivity): *CAR-10* with GEN, *GEN-4* with CAR, *PIT-1* with STR, and *STR-2* with PIT. Stability was assessed with 12-day evolution experiments using a serial transfer protocol (100  $\mu$ l batch cultures, 2% serial transfers every 12 h; the starting population size for the different populations was approx.  $10^6$  CFU/ml), as previously described (Roemhild et al., 2018). Each population was evaluated with 8 replicate populations (4 clones x 2 technical replicates distributed in two plates: plate A and plate B) for each of 5 treatment groups: (i) untreated controls; linearly increasing concentration of hypersensitive antibiotic to a low level (ii) or high level (iii), without maintaining selection for previous resistance (unconstrained evolution); or linearly increasing concentration of hypersensitive antibiotic to a low level (iv) or high level (v), with simultaneous selection for previous resistance (constrained evolution). Concentration increases were started with defined initial inhibition levels of 50% ( $IC_{50}$ ) and concluded when concentrations were above the  $IC_{95}$  of the hypersensitive strain (mild increases) or  $IC_{95}$  of the wildtype PA14 strain (strong increases), as specified in Supplementary Table 1. Antibiotic selection was applied in 96-well plates and population growth was monitored throughout treatment by continuous measurements of  $OD_{600}$  in 15 min intervals (BioTek Instruments, USA; Ref. EON; 37°C, 180 rpm double-orbital shaking). Extinction frequencies were determined at the end of the experiment by counting cases in which no growth was observed after an additional transfer to antibiotic-free media and 24 h of incubation. Surviving evolved populations were frozen at -80°C in 10% (v/v) DMSO, at the end of the experiment.

455  
456  
457  
458  
459  
460  
461  
462  
463  
464  
465  
466  
467  
468  
469  
470  
471  
472  
473  
474  
475  
476  
477  
478  
479  
480  
481  
482  
483  
484  
485  
486  
487  
488  
489  
490  
491  
492  
493  
494  
495  
496  
497  
498  
499  
500  
501  
502

**Relative biomass.** The continuous measurements of optical density during treatment provided a detailed growth trajectory that accurately describes the dynamics of resistance emergence. Relative biomass was defined as total optical growth relative to untreated control treatments, and was calculated by the ratio of the areas under the time-OD curves of treated compared to untreated controls that are passaged in parallel, as previously described (Roemhild et al., 2018).

**Resistance of evolved populations.** Resistance of evolved populations was measured for the respective antibiotic pairs (GEN/CAR or STR/PIT), as described above, but using two-fold concentrations (1/4 to 8x the MIC of the starting clone). The respective starting clones of each evolved population served as controls and were measured in parallel. Resistance changes were quantified by subtracting the area under the dose-response curve of the evolved populations from that of the ancestral clones. Positive values indicate that the evolved lineages are more resistant than their ancestor, values close to zero indicate equivalent resistance levels, and negative values denote a loss of resistance. For the cases of re-sensitization against GEN, we performed the experiments a second time including the PA14 ancestor to serve as an additional control (Supplementary Fig. 1).

**Growth rate analyses.** Maximum exponential growth rates of evolved and ancestral populations were calculated from growth curves in drug-free media, using a sliding window approach. For measurements, sample cultures were diluted 50x from early stationary phase into 96-well plates (100  $\mu$ l total volume) and growth was measured by OD<sub>600</sub> every 15 min for 12 h. Growth rate were calculated from log-transformed OD data for sliding windows of 1 h, yielding two-peaked curves indicating initial growth on glucose and citrate. The reported values the maximum values of the first, larger peak. The values reported in Fig. 3 are the changes of growth rate in evolved populations relative to their resistant ancestors.

**Genomics.** We re-sequenced whole genomes of 5 starting clones (CAR-10 clone 2, GEN-2 clones 1-4), and 21 evolved populations (all descendants of these clones from plate B, including 5 untreated evolved control populations and 16 populations adapted to different treatment conditions) using samples from the end of the evolution experiments. Frozen material was thawed and grown in 10 ml of M9 minimal medium for 16-20 h at 37°C with constant shaking. Genomic DNA was extracted using a modified CTAB buffer protocol (Schulenburg et al., 2001) and sequenced at the Institute for Clinical Microbiology, Kiel University Hospital, using Illumina HiSeq paired-end technology with an insert size of 150 bp and 300x coverage. For the genomic analysis, we followed an established pipeline (Jansen et al., 2015). Briefly, reads were trimmed with Trimmomatic (Bolger, Lohse, & Usadel, 2014), and mapped to the UCBPP-PA14 reference genome (available at <http://pseudomonas.com/strain/download>) using bwa and samtools (H. Li & Durbin, 2010; H. Li et al., 2009). We used MarkDuplicates in Picardtools to remove duplicated regions for single nucleotide polymorphisms (SNPs) and structural variants (SVs). To call SNPs and small SV we employed both heuristic and frequentist methods, only for variants above a threshold frequency of 0.1 and base quality above 20, using respectively VarScan and SNVer (Wei, Wang, Hu, Lyon, & Hakonarson, 2011). Larger SVs were detected by Pindel and CNVnator (Abyzov, Urban, Snyder, & Gerstein, 2011; Ye, Schulz, Long, Apweiler, & Ning, 2009; Ye et al., 2009). Variants were annotated using snpEFF (Cingolani et al., 2012), DAVID, and the *Pseudomonas* database (<http://pseudomonas.com>). Variants detected in the untreated

503 evolved populations were removed from all other populations and analyses as these likely  
504 reflect adaptation to the lab media and not treatment. The fasta files of all sequenced  
505 populations here are available from NCBI under the BioProject number: PRJNA524114  
506

507 **Genetic manipulation.** To understand re-sensitization, we analyzed candidate mutations  
508 from the GEN->CAR switch. The *nalD* mutation 1551588G>T (resulting in amino acid change  
509 p.T11N, as observed in replicate populations b24\_G8, b24\_D9, and b24\_A9) was introduced  
510 into the PA14 genetic background using a scar-free recombination method (Trebosc et al.,  
511 2016). The same techniques were previously used to construct the mutants *nalC* (deletion  
512 1391016-1391574) and *pmrB* (5637090T>A, resulting in amino acid change p.V136E) in the  
513 PA14 ancestor background (Barbosa et al., 2017). Based on these mutants and with the  
514 same techniques, we constructed the double mutants *pmrB*, *nalD* (*pmrB* p.V136E + *nalD*  
515 p.T11N), and *pmrB*, *nalC* (*pmrB* p.V136E + *nalC* deletion c.49-249, as observed in population  
516 b24\_F7). Genetic manipulation and confirmation by sequencing was performed by BioVersys  
517 AG (Hochbergerstrasse 60c, CH-4057 Basel, Switzerland).  
518

519 **Epistasis analysis.** Resistance of constructed mutant strains was measured in direct  
520 comparison to wildtype PA14, as described above. Relative fold-changes in MIC were  
521 calculated from dose-response curves. The expected relative resistance of the double  
522 mutants was calculated by multiplication of the mutation's individual effects, as previously  
523 described (Wong, 2017). For example, if mutation A conferred a 2-fold increase in resistance  
524 and mutation B conferred a 4-fold increase of resistance, the expected resistance of the  
525 double mutant AB would be  $2 \times 4 = 8$ . A deviation from this null model indicates epistasis,  
526 which can be either positive (greater resistance than expected) or negative (lesser resistance  
527 than expected).  
528



529  
530  
531  
532  
533  
534  
535  
536  
537  
538  
539  
540  
541  
542  
543  
544  
545  
546  
547  
548  
549  
550  
551  
552  
553  
554

## References

- Abyzov, A., Urban, A. E., Snyder, M., & Gerstein, M. (2011). CNVnator: An approach to discover, genotype and characterize typical and atypical CNVs from family and population genome sequencing. *Genome Research*, gr.114876.110.  
<https://doi.org/10.1101/gr.114876.110>
- Barbosa, C., Beardmore, R., Schulenburg, H., & Jansen, G. (2018). Antibiotic combination efficacy (ACE) networks for a *Pseudomonas aeruginosa* model. *PLOS Biology*, 16(4), e2004356. <https://doi.org/10.1371/journal.pbio.2004356>
- Barbosa, C., Trebosc, V., Kemmer, C., Rosenstiel, P., Beardmore, R., Schulenburg, H., & Jansen, G. (2017). Alternative Evolutionary Paths to Bacterial Antibiotic Resistance Cause Distinct Collateral Effects. *Molecular Biology and Evolution*, 34(9), 2229–2244. <https://doi.org/10.1093/molbev/msx158>
- Baym, M., Stone, L. K., & Kishony, R. (2016). Multidrug evolutionary strategies to reverse antibiotic resistance. *Science*, 351(6268), aad3292.  
<https://doi.org/10.1126/science.aad3292>
- Bell, G., & Gonzalez, A. (2011). Adaptation and Evolutionary Rescue in Metapopulations Experiencing Environmental Deterioration. *Science*, 332(6035), 1327–1330.  
<https://doi.org/10.1126/science.1203105>
- Bloemberg, G. V., Keller, P. M., Stucki, D., Trauner, A., Borrell, S., Latshang, T., ... Böttger, E. C. (2015). Acquired Resistance to Bedaquiline and Delamanid in Therapy for Tuberculosis. *New England Journal of Medicine*, 373(20), 1986–1988.  
<https://doi.org/10.1056/NEJMc1505196>
- Bolger, A. M., Lohse, M., & Usadel, B. (2014). Trimmomatic: a flexible trimmer for Illumina sequence data. *Bioinformatics*, 30(15), 2114–2120.  
<https://doi.org/10.1093/bioinformatics/btu170>

- 555 Chait, R., Craney, A., & Kishony, R. (2007). Antibiotic interactions that select against  
556 resistance. *Nature*, 446(7136), 668–671. <https://doi.org/10.1038/nature05685>
- 557 Cingolani, P., Platts, A., Wang, L. L., Coon, M., Nguyen, T., Wang, L., ... Ruden, D. M.  
558 (2012). A program for annotating and predicting the effects of single nucleotide  
559 polymorphisms, SnpEff: SNPs in the genome of *Drosophila melanogaster* strain  
560 w11118; iso-2; iso-3. *Fly*, 6(2), 80–92. <https://doi.org/10.4161/fly.19695>
- 561 Davies, J., & Davies, D. (2010). Origins and Evolution of Antibiotic Resistance.  
562 *Microbiology and Molecular Biology Reviews*, 74(3), 417–433.  
563 <https://doi.org/10.1128/MMBR.00016-10>
- 564 Dhawan, A., Nichol, D., Kinose, F., Abazeed, M. E., Marusyk, A., Haura, E. B., & Scott, J.  
565 G. (2017). Collateral sensitivity networks reveal evolutionary instability and novel  
566 treatment strategies in ALK mutated non-small cell lung cancer. *Scientific Reports*,  
567 7(1), 1232. <https://doi.org/10.1038/s41598-017-00791-8>
- 568 El’Garch, F., Jeannot, K., Hocquet, D., Llanes-Barakat, C., & Plésiat, P. (2007). Cumulative  
569 Effects of Several Nonenzymatic Mechanisms on the Resistance of *Pseudomonas*  
570 *aeruginosa* to Aminoglycosides. *Antimicrobial Agents and Chemotherapy*, 51(3),  
571 1016–1021. <https://doi.org/10.1128/AAC.00704-06>
- 572 Evgrafov, M. R. de, Gumpert, H., Munck, C., Thomsen, T. T., & Sommer, M. O. A. (2015).  
573 Collateral Resistance and Sensitivity Modulate Evolution of High-Level Resistance to  
574 Drug Combination Treatment in *Staphylococcus aureus*. *Molecular Biology and*  
575 *Evolution*, 32(5), 1175–1185. <https://doi.org/10.1093/molbev/msv006>
- 576 Feinbaum, R. L., Urbach, J. M., Liberati, N. T., Djonovic, S., Adonizio, A., Carvunis, A.-R.,  
577 & Ausubel, F. M. (2012). Genome-Wide Identification of *Pseudomonas aeruginosa*  
578 Virulence-Related Genes Using a *Caenorhabditis elegans* Infection Model. *PLOS*  
579 *Pathogens*, 8(7), e1002813. <https://doi.org/10.1371/journal.ppat.1002813>

- 580 Gatenby, R. A., Silva, A. S., Gillies, R. J., & Frieden, B. R. (2009). Adaptive Therapy.  
581 *Cancer Research*, 69(11), 4894–4903. <https://doi.org/10.1158/0008-5472.CAN-08->  
582 3658
- 583 Gonzales, P. R., Pesesky, M. W., Bouley, R., Ballard, A., Bidy, B. A., Suckow, M. A., ...  
584 Dantas, G. (2015). Synergistic, collaterally sensitive  $\beta$ -lactam combinations suppress  
585 resistance in MRSA. *Nature Chemical Biology*, advance online publication.  
586 <https://doi.org/10.1038/nchembio.1911>
- 587 Gooderham, W. J., & Hancock, R. E. W. (2009). Regulation of virulence and antibiotic  
588 resistance by two-component regulatory systems in *Pseudomonas aeruginosa*. *FEMS*  
589 *Microbiology Reviews*, 33(2), 279–294. <https://doi.org/10.1111/j.1574->  
590 6976.2008.00135.x
- 591 Gottesman, M. M. (2002). Mechanisms of cancer drug resistance. *Annual Review of*  
592 *Medicine*, 53, 615–627. <https://doi.org/10.1146/annurev.med.53.082901.103929>
- 593 Hansen, E., Woods, R. J., & Read, A. F. (2017). How to Use a Chemotherapeutic Agent  
594 When Resistance to It Threatens the Patient. *PLOS Biology*, 15(2), e2001110.  
595 <https://doi.org/10.1371/journal.pbio.2001110>
- 596 Hegreness, M., Shoresh, N., Damian, D., Hartl, D., & Kishony, R. (2008). Accelerated  
597 evolution of resistance in multidrug environments. *Proceedings of the National*  
598 *Academy of Sciences*, 105(37), 13977–13981.  
599 <https://doi.org/10.1073/pnas.0805965105>
- 600 Hocquet, D., Vogne, C., Garch, F. E., Vejux, A., Gotoh, N., Lee, A., ... Plésiat, P. (2003).  
601 MexXY-OprM Efflux Pump Is Necessary for Adaptive Resistance of *Pseudomonas*  
602 *aeruginosa* to Aminoglycosides. *Antimicrobial Agents and Chemotherapy*, 47(4),  
603 1371–1375. <https://doi.org/10.1128/AAC.47.4.1371-1375.2003>
- 604 Imamovic, L., Ellabaan, M. M. H., Dantas Machado, A. M., Citterio, L., Wulff, T., Molin, S.,  
605 ... Sommer, M. O. A. (2018). Drug-Driven Phenotypic Convergence Supports

- 606 Rational Treatment Strategies of Chronic Infections. *Cell*, 172(1), 121-134.e14.  
607 <https://doi.org/10.1016/j.cell.2017.12.012>
- 608 Imamovic, L., & Sommer, M. O. A. (2013). Use of Collateral Sensitivity Networks to Design  
609 Drug Cycling Protocols That Avoid Resistance Development. *Science Translational*  
610 *Medicine*, 5(204), 204ra132-204ra132. <https://doi.org/10.1126/scitranslmed.3006609>
- 611 Jansen, G., Crummenerl, L. L., Gilbert, F., Mohr, T., Pfefferkorn, R., Thänert, R., ...  
612 Schulenburg, H. (2015). Evolutionary Transition from Pathogenicity to  
613 Commensalism: Global Regulator Mutations Mediate Fitness Gains through Virulence  
614 Attenuation. *Molecular Biology and Evolution*, 32(11), 2883–2896.  
615 <https://doi.org/10.1093/molbev/msv160>
- 616 Jansen, G., Mahrt, N., Tueffers, L., Barbosa, C., Harjes, M., Adolph, G., ... Schulenburg, H.  
617 (2016). Association between clinical antibiotic resistance and susceptibility of  
618 *Pseudomonas* in the cystic fibrosis lung. *Evolution, Medicine, and Public Health*,  
619 2016(1), 182–194. <https://doi.org/10.1093/emph/eow016>
- 620 Jiao, Y. J., Baym, M., Veres, A., & Kishony, R. (2016). Population diversity jeopardizes the  
621 efficacy of antibiotic cycling. *BioRxiv*, 082107. <https://doi.org/10.1101/082107>
- 622 Kim, S., Lieberman, T. D., & Kishony, R. (2014). Alternating antibiotic treatments constrain  
623 evolutionary paths to multidrug resistance. *Proceedings of the National Academy of*  
624 *Sciences*, 111(40), 14494–14499. <https://doi.org/10.1073/pnas.1409800111>
- 625 Lázár, V., Nagy, I., Spohn, R., Csörgő, B., Györkei, Á., Nyerges, Á., ... Pál, C. (2014).  
626 Genome-wide analysis captures the determinants of the antibiotic cross-resistance  
627 interaction network. *Nature Communications*, 5, 4352.  
628 <https://doi.org/10.1038/ncomms5352>
- 629 Lázár, V., Singh, G. P., Spohn, R., Nagy, I., Horváth, B., Hrtyan, M., ... Pál, C. (2013).  
630 Bacterial evolution of antibiotic hypersensitivity. *Molecular Systems Biology*, 9(1).  
631 <https://doi.org/10.1038/msb.2013.57>

- 632 Li, H., & Durbin, R. (2010). Fast and accurate long-read alignment with Burrows–Wheeler  
633 transform. *Bioinformatics*, 26(5), 589–595.  
634 <https://doi.org/10.1093/bioinformatics/btp698>
- 635 Li, H., Handsaker, B., Wysoker, A., Fennell, T., Ruan, J., Homer, N., ... Subgroup, 1000  
636 Genome Project Data Processing. (2009). The Sequence Alignment/Map format and  
637 SAMtools. *Bioinformatics*, 25(16), 2078–2079.  
638 <https://doi.org/10.1093/bioinformatics/btp352>
- 639 Li, X.-Z., Elkins, C. A., & Zgurskaya, H. I. (Eds.). (2016). *Efflux-Mediated Antimicrobial*  
640 *Resistance in Bacteria: Mechanisms, Regulation and Clinical Implications* (1st ed.  
641 2016 edition). New York, NY: Adis.
- 642 Lindsey, H. A., Gallie, J., Taylor, S., & Kerr, B. (2013). Evolutionary rescue from extinction  
643 is contingent on a lower rate of environmental change. *Nature*, 494(7438), 463.  
644 <https://doi.org/10.1038/nature11879>
- 645 Maltas, J., & Wood, K. B. (2019). Pervasive and diverse collateral sensitivity profiles inform  
646 optimal strategies to limit antibiotic resistance. *BioRxiv*, 241075.  
647 <https://doi.org/10.1101/241075>
- 648 Maseda, H., Sawada, I., Saito, K., Uchiyama, H., Nakae, T., & Nomura, N. (2004).  
649 Enhancement of the mexAB-oprM Efflux Pump Expression by a Quorum-Sensing  
650 Autoinducer and Its Cancellation by a Regulator, MexT, of the mexEF-oprN Efflux  
651 Pump Operon in *Pseudomonas aeruginosa*. *Antimicrobial Agents and Chemotherapy*,  
652 48(4), 1320–1328. <https://doi.org/10.1128/AAC.48.4.1320-1328.2004>
- 653 Munck, C., Gumpert, H. K., Wallin, A. I. N., Wang, H. H., & Sommer, M. O. A. (2014).  
654 Prediction of resistance development against drug combinations by collateral  
655 responses to component drugs. *Science Translational Medicine*, 6(262), 262ra156-  
656 262ra156. <https://doi.org/10.1126/scitranslmed.3009940>

- 657 Nichol, D., Jeavons, P., Fletcher, A. G., Bonomo, R. A., Maini, P. K., Paul, J. L., ... Scott, J.  
658 G. (2015). Steering Evolution with Sequential Therapy to Prevent the Emergence of  
659 Bacterial Antibiotic Resistance. *PLOS Computational Biology*, 11(9), e1004493.  
660 <https://doi.org/10.1371/journal.pcbi.1004493>
- 661 Nichol, D., Rutter, J., Bryant, C., Hujer, A. M., Lek, S., Adams, M. D., ... Scott, J. G. (2019).  
662 Antibiotic collateral sensitivity is contingent on the repeatability of evolution. *Nature*  
663 *Communications*, 10(1), 334. <https://doi.org/10.1038/s41467-018-08098-6>
- 664 Oz, T., Guvenek, A., Yildiz, S., Karaboga, E., Tamer, Y. T., Mumcuyan, N., ... Toprak, E.  
665 (2014). Strength of Selection Pressure Is an Important Parameter Contributing to the  
666 Complexity of Antibiotic Resistance Evolution. *Molecular Biology and Evolution*,  
667 31(9), 2387–2401. <https://doi.org/10.1093/molbev/msu191>
- 668 Pál, C., Papp, B., & Lázár, V. (2015). Collateral sensitivity of antibiotic-resistant microbes.  
669 *Trends in Microbiology*, 23(7), 401–407. <https://doi.org/10.1016/j.tim.2015.02.009>
- 670 Pluchino, K. M., Hall, M. D., Goldsborough, A. S., Callaghan, R., & Gottesman, M. M.  
671 (2012). Collateral sensitivity as a strategy against cancer multidrug resistance. *Drug*  
672 *Resistance Updates*, 15(1), 98–105. <https://doi.org/10.1016/j.drug.2012.03.002>
- 673 Podnecky, N. L., Fredheim, E. G. A., Kloos, J., Sørum, V., Primicerio, R., Roberts, A. P., ...  
674 Johnsen, P. J. (2018). Conserved collateral antibiotic susceptibility networks in diverse  
675 clinical strains of *Escherichia coli*. *Nature Communications*, 9(1), 3673.  
676 <https://doi.org/10.1038/s41467-018-06143-y>
- 677 Rahme, L. G., Stevens, E. J., Wolfort, S. F., Shao, J., Tompkins, R. G., & Ausubel, F. M.  
678 (1995). Common virulence factors for bacterial pathogenicity in plants and animals.  
679 *Science (New York, N.Y.)*, 268(5219), 1899–1902.
- 680 Roemhild, R., Barbosa, C., Beardmore, R. E., Jansen, G., & Schulenburg, H. (2015).  
681 Temporal variation in antibiotic environments slows down resistance evolution in

- 682 pathogenic *Pseudomonas aeruginosa*. *Evolutionary Applications*, 8(10), 945–955.  
683 <https://doi.org/10.1111/eva.12330>
- 684 Roemhild, R., Gokhale, C. S., Dirksen, P., Blake, C., Rosenstiel, P., Traulsen, A., ...  
685 Schulenburg, H. (2018). Cellular hysteresis as a principle to maximize the efficacy of  
686 antibiotic therapy. *Proceedings of the National Academy of Sciences*, 115(39), 9767–  
687 9772. <https://doi.org/10.1073/pnas.1810004115>
- 688 Roemhild, R., & Schulenburg, H. (2019). Evolutionary Ecology meets the Antibiotic Crisis:  
689 Can we control Pathogen Adaptation through Sequential Therapy? *Evolution,*  
690 *Medicine, and Public Health, in press*. <https://doi.org/10.1093/emph/eoz008>
- 691 Rosenkilde, C. E. H., Munck, C., Porse, A., Linkevicius, M., Andersson, D. I., & Sommer, M.  
692 O. A. (2019). Collateral sensitivity constrains resistance evolution of the CTX-M-15  
693  $\beta$ -lactamase. *Nature Communications*, 10(1), 618. [https://doi.org/10.1038/s41467-019-](https://doi.org/10.1038/s41467-019-08529-y)  
694 08529-y
- 695 Schulenburg, V. D., Graf, J. H., Hancock, J. M., Pagnamenta, A., Sloggett, J. J., Majerus, M.  
696 E. N., & Hurst, G. D. D. (2001). Extreme Length and Length Variation in the First  
697 Ribosomal Internal Transcribed Spacer of Ladybird Beetles (Coleoptera:  
698 Coccinellidae). *Molecular Biology and Evolution*, 18(4), 648–660.  
699 <https://doi.org/10.1093/oxfordjournals.molbev.a003845>
- 700 Shaw, A. T., Friboulet, L., Leshchiner, I., Gainor, J. F., Bergqvist, S., Brooun, A., ...  
701 Engelman, J. A. (2015). Resensitization to Crizotinib by the Lorlatinib ALK  
702 Resistance Mutation L1198F. *New England Journal of Medicine*, 374(1), 54–61.  
703 <https://doi.org/10.1056/NEJMoa1508887>
- 704 Sobel, M. L., Neshat, S., & Poole, K. (2005). Mutations in PA2491 (*mexS*) Promote MexT-  
705 Dependent *mexEF-oprN* Expression and Multidrug Resistance in a Clinical Strain of  
706 *Pseudomonas aeruginosa*. *Journal of Bacteriology*, 187(4), 1246–1253.  
707 <https://doi.org/10.1128/JB.187.4.1246-1253.2005>

- 708 Szybalski, W., & Bryson, V. (1952). Genetic studies on microbial cross resistance to toxic  
709 agents I. Cross resistance of *Escherichia coli* to fifteen antibiotics. *Journal of*  
710 *Bacteriology*, 64(4), 489–499.
- 711 Torella, J. P., Chait, R., & Kishony, R. (2010). Optimal Drug Synergy in Antimicrobial  
712 Treatments. *PLoS Comput Biol*, 6(6), e1000796.  
713 <https://doi.org/10.1371/journal.pcbi.1000796>
- 714 Trebosc, V., Gartenmann, S., Royet, K., Manfredi, P., Tötzl, M., Schellhorn, B., ... Kemmer,  
715 C. (2016). A Novel Genome-Editing Platform for Drug-Resistant *Acinetobacter*  
716 *baumannii* Reveals an AdeR-Unrelated Tigecycline Resistance Mechanism.  
717 *Antimicrobial Agents and Chemotherapy*, 60(12), 7263–7271.  
718 <https://doi.org/10.1128/AAC.01275-16>
- 719 Wei, Z., Wang, W., Hu, P., Lyon, G. J., & Hakonarson, H. (2011). SNVer: a statistical tool  
720 for variant calling in analysis of pooled or individual next-generation sequencing data.  
721 *Nucleic Acids Research*, 39(19), e132–e132. <https://doi.org/10.1093/nar/gkr599>
- 722 Weinreich, D. M., Delaney, N. F., Depristo, M. A., & Hartl, D. L. (2006). Darwinian  
723 evolution can follow only very few mutational paths to fitter proteins. *Science (New*  
724 *York, N.Y.)*, 312(5770), 111–114. <https://doi.org/10.1126/science.1123539>
- 725 Wistrand-Yuen, E., Knopp, M., Hjort, K., Koskiniemi, S., Berg, O. G., & Andersson, D. I.  
726 (2018). Evolution of high-level resistance during low-level antibiotic exposure. *Nature*  
727 *Communications*, 9(1), 1599. <https://doi.org/10.1038/s41467-018-04059-1>
- 728 Wong, A. (2017). Epistasis and the Evolution of Antimicrobial Resistance. *Frontiers in*  
729 *Microbiology*, 8. <https://doi.org/10.3389/fmicb.2017.00246>
- 730 Ye, K., Schulz, M. H., Long, Q., Apweiler, R., & Ning, Z. (2009). Pindel: a pattern growth  
731 approach to detect break points of large deletions and medium sized insertions from  
732 paired-end short reads. *Bioinformatics*, 25(21), 2865–2871.  
733 <https://doi.org/10.1093/bioinformatics/btp394>



- 734 Yen, P., & Papin, J. A. (2017). History of antibiotic adaptation influences microbial  
735 evolutionary dynamics during subsequent treatment. *PLOS Biology*, *15*(8), e2001586.  
736 <https://doi.org/10.1371/journal.pbio.2001586>
- 737 Yoshida, M., Reyes, S. G., Tsuda, S., Horinouchi, T., Furusawa, C., & Cronin, L. (2017).  
738 Time-programmable drug dosing allows the manipulation, suppression and reversal of  
739 antibiotic drug resistance *in vitro*. *Nature Communications*, *8*, 15589.  
740 <https://doi.org/10.1038/ncomms15589>
- 741 Zaretsky, J. M., Garcia-Diaz, A., Shin, D. S., Escuin-Ordinas, H., Hugo, W., Hu-Lieskovan,  
742 S., ... Ribas, A. (2016). Mutations Associated with Acquired Resistance to PD-1  
743 Blockade in Melanoma. *New England Journal of Medicine*, *375*(9), 819–829.  
744 <https://doi.org/10.1056/NEJMoa1604958>
- 745 Zhao, B., Sedlak, J. C., Srinivas, R., Creixell, P., Pritchard, J. R., Tidor, B., ... Hemann, M. T.  
746 (2016). Exploiting Temporal Collateral Sensitivity in Tumor Clonal Evolution. *Cell*,  
747 *165*(1), 234–246. <https://doi.org/10.1016/j.cell.2016.01.045>
- 748  
749

750 **Acknowledgements**

751 We thank D. I. Andersson, R. Kishony, C. Kost, and V. Lázár for feedback on the manuscript.  
752 Genome sequencing was performed by G. Hemmrich-Stanisak and M. Vollstedt from the  
753 Institute of Clinical Molecular Biology in Kiel, as supported by the DFG Cluster of Excellence  
754 EXC 306 “Inflammation at Interfaces”. This research was funded by the Deutsche  
755 Forschungsgemeinschaft (DFG, German Research Foundation) individual grant SCHU  
756 1415/12 (to H.S.) and also under Germany’s Excellence Strategy – EXC 22167-39088401  
757 (Excellence Cluster Precision Medicine in chronic Inflammation; H.S., P.R.), the Leibniz  
758 Science Campus Evolutionary Medicine of the Lung (EvoLUNG; H.S., C.B.), the International  
759 Max-Planck-Research School for Evolutionary Biology (C.B., R.R.), and the Max-Planck Society  
760 (H.S., R.R.).  
761

762 **Author contributions**

763 C.B., R.R. and H.S. designed research, C.B. and R.R. jointly performed experiments and  
764 analyzed the data, C.B., R.R. and P.R. analyzed genomic data. All authors wrote the paper.  
765

766 **Competing interests statement**

767 The authors declare no competing interests.  
768

769 **Supplementary File**

770 The Supplementary File contains Supplementary Figures S1-S3 and Supplementary Tables S1-  
771 S4

772

773

774 **Source Data Files**

775

776 **Source Data 1 (separate file)**

777 Source data for Figure 1b and 1c. Mean optical density and CI95 values obtained after 12  
778 hours of growth in minimal media and different antibiotics. The populations tested here  
779 include the PA14 wt, and four resistant populations described in Barbosa et al., 2017. Each  
780 value is the average of 8 technical replicates per bacterial population.

781

782 **Source Data 2 (separate file)**

783 Source data for Figure 2. Count data of extinction events. Extinct populations were  
784 determined by their inability to grow in rich media after 24 hours of incubation at 37°C.

785

786 **Source Data 3 (separate file)**

787 Source data for Figure 3a and 3b. Evolutionary dynamics summarized by the area under the  
788 curve (AUC) relative to the treatment with no drugs for the evolution experiments CAR<sup>R</sup>-  
789 >GEN and GEN<sup>R</sup>->CAR.

790

791 **Source Data 4 (separate file)**

792 Source data for Supplementary Figure S1a. Growth characteristics measured by optical  
793 density under various drug concentrations for the populations adapted to unconstrained  
794 environments (strong and mild), as well as the PA14 wt against gentamicin. Each population-  
795 drug concentration was evaluated in triplicate.

796

797 **Source Data 5 (separate file)**

798 Source data for Supplementary Figure S1b. Change in resistance of populations adapted to  
799 unconstrained environments (strong and mild) relative to the PA14 wt against gentamicin.  
800 This was inferred by calculating the difference between the evolved populations and the  
801 PA14 wt in the area under the curve across drug concentrations.

802

803 **Source Data 6 (separate file)**

804 Source Data for Figure 3c, 3d, 3e, and 3f. Dose-response curves data of surviving populations  
805 and the respective ancestors challenged with carbenicillin or gentamicin. Optical density  
806 values were recorded after 12 hours of incubation at 37°C.

807

808 **Source Data 7 (separate file)**

809 Source Data for Figure 3e, 3f, and Supplementary Figure S2. Growth rate estimates of the  
810 surviving populations and the respective ancestors challenged with carbenicillin or  
811 gentamicin. Growth rate was calculated as indicated in the Methods section.

812

813 **Data Source 8 (separate file)**

814 Source Data for Figure 4a and 4b. Genetic changes compared to *Pseudomonas aeruginosa*  
815 PA14 wt strain as determined by whole-genome resequencing (Illumina MiSeq2x150bp PE,  
816 Nextera libraries). Isolates are coded with AA-BB-CC-: AA, antibiotic to which they are  
817 originally resistant; BB, antibiotic to which the clone shows collateral sensitivity; CC, well in  
818 the plate during experimental evolution.  
819

820 **Data Source 9 (separate file)**

821 Source Data for Figure 4c and 4d. Estimated MIC values for several constructed mutants  
822 against carbenicillin and gentamicin.

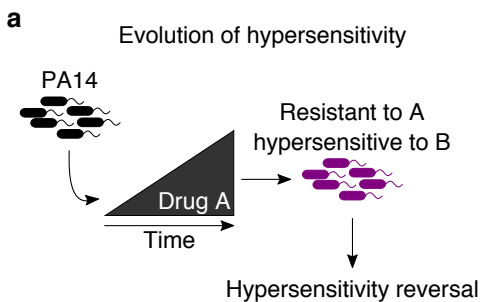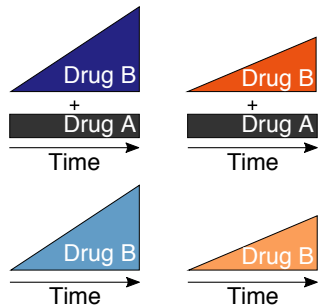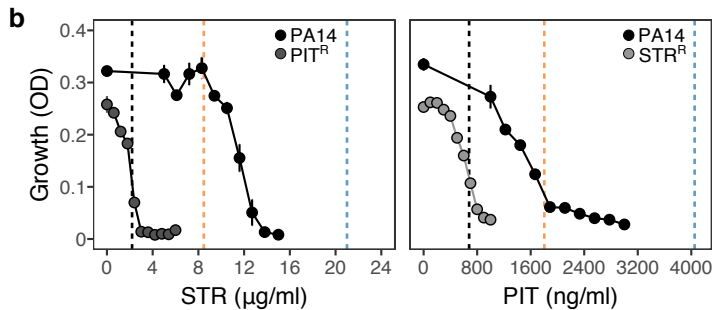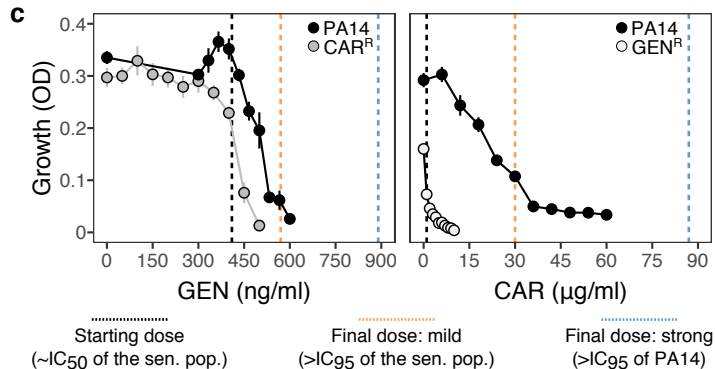

Extinction (max=8)

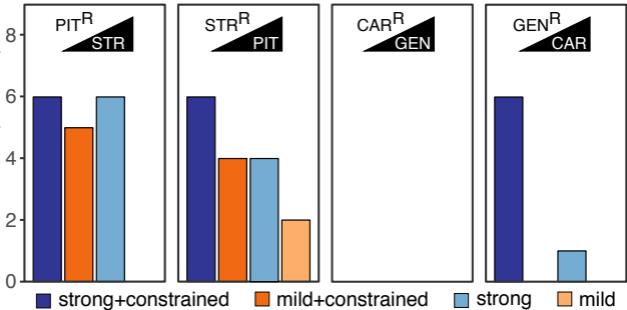

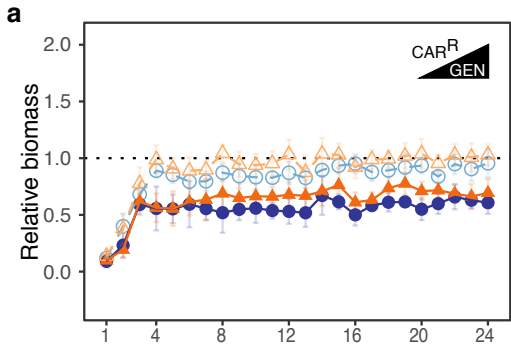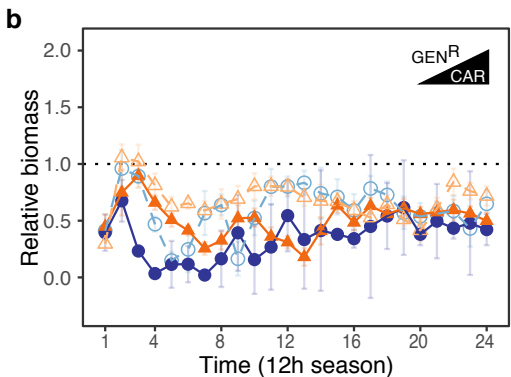

● ■ strong+constrained   
 ▲ ■ mild+constrained   
 ○ ■ strong   
 △ ■ mild

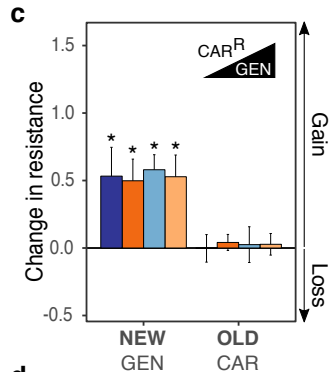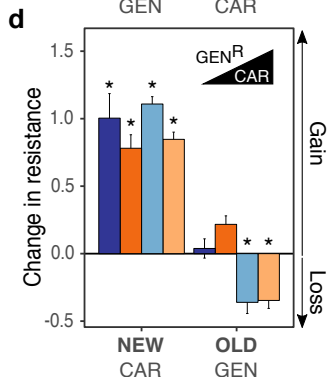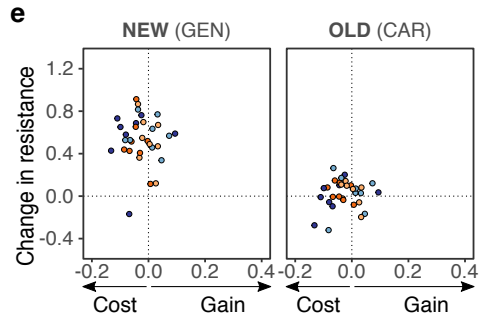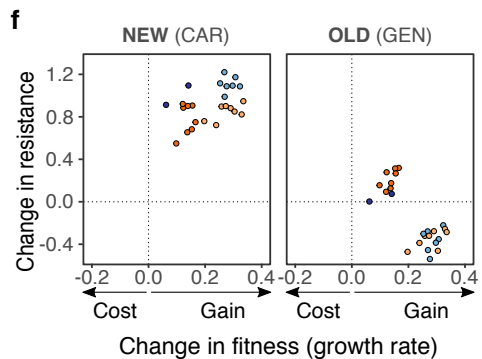



Frequency (% of reads)   
 [X] Previous mutation   
 [X] New mutation

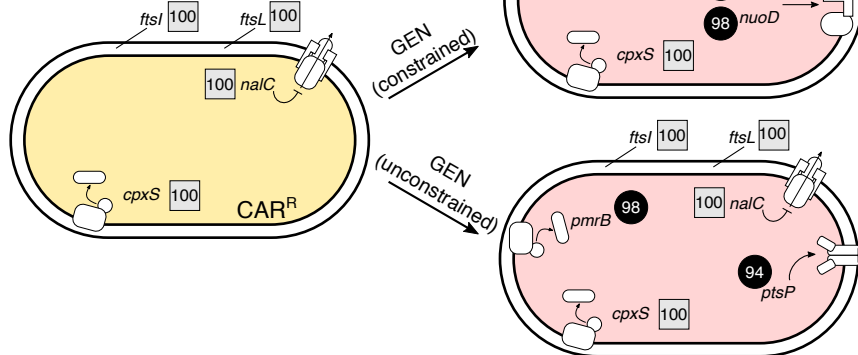

**b**

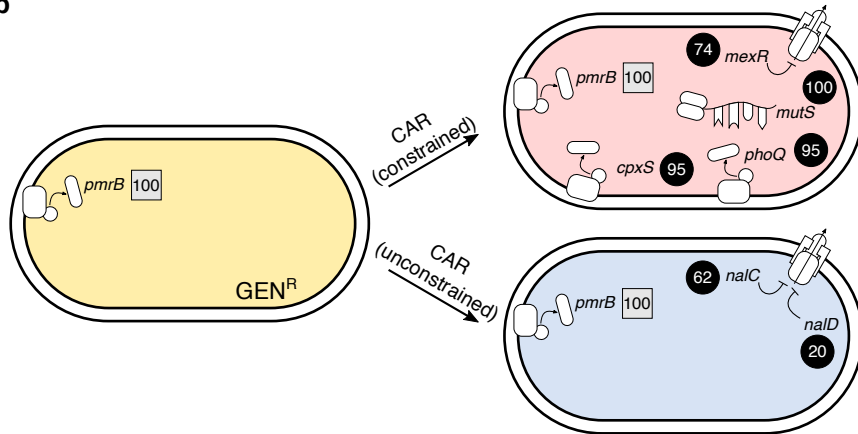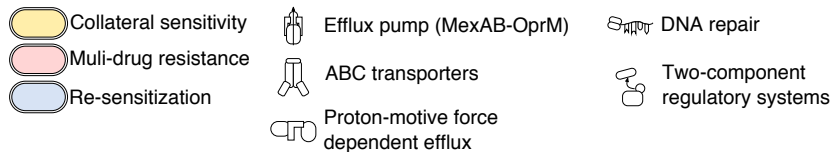

**c**

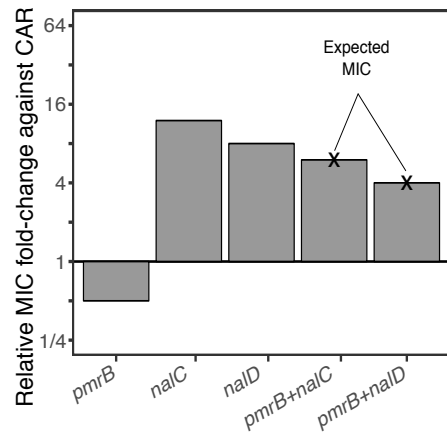

**d**

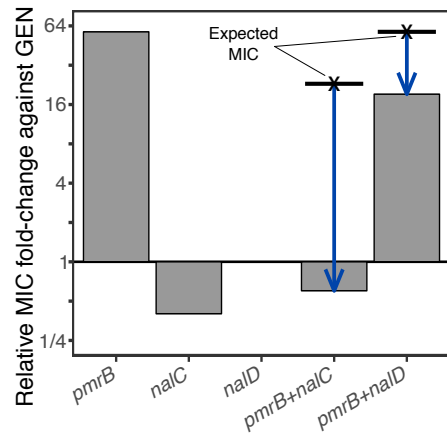

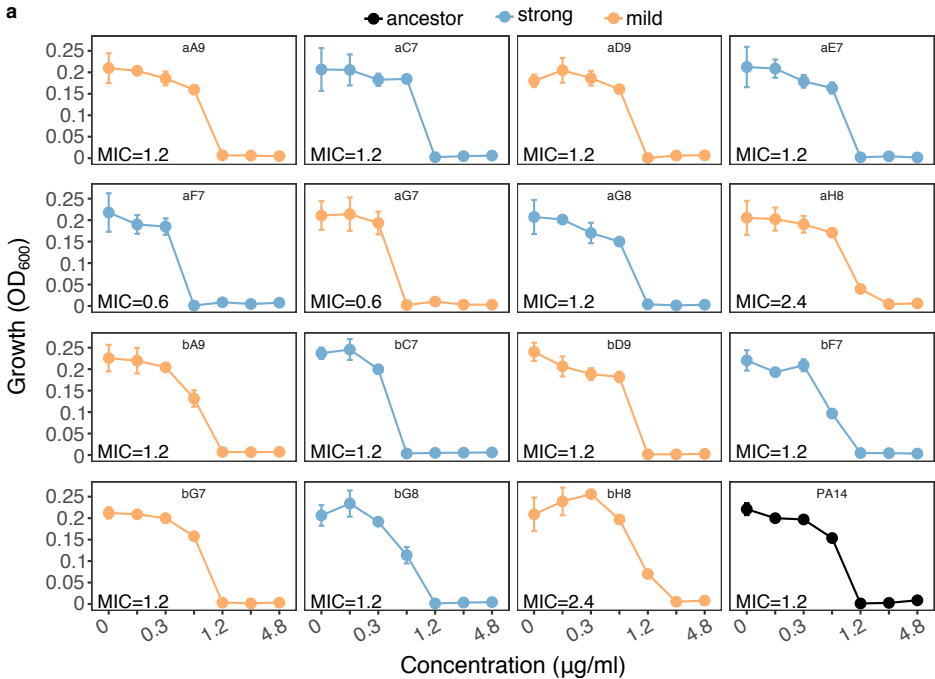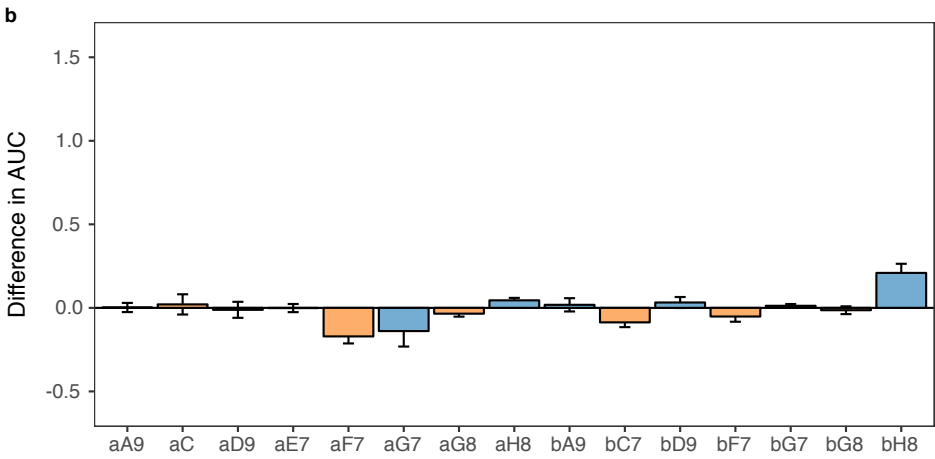

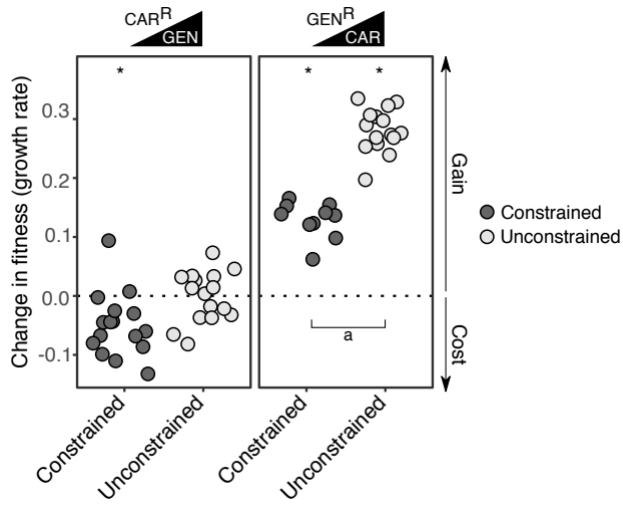

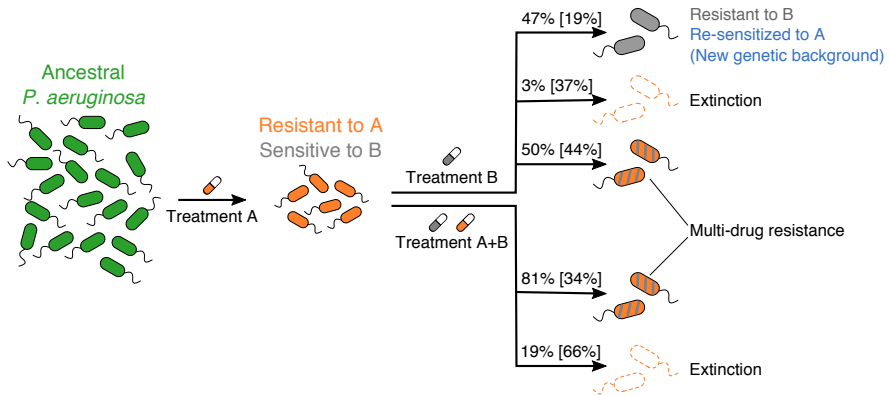

# Supplementary Information for

Evolutionary stability of collateral sensitivity to antibiotics in the model pathogen  
*Pseudomonas aeruginosa*

Camilo Barbosa, Roderich Roemhild, Philip Rosenstiel, Hinrich Schulenburg

Hinrich Schulenburg

Email: [hschulenburg@zoologie.uni-kiel.de](mailto:hschulenburg@zoologie.uni-kiel.de)

## **This PDF file includes:**

Supplementary Figures 1 to 3  
Supplementary Tables 1 to 4  
Captions for source data files 1 to 9

## **Other supplementary materials provided as separate files:**

Source data files 1 to 9

## Supplementary Figures

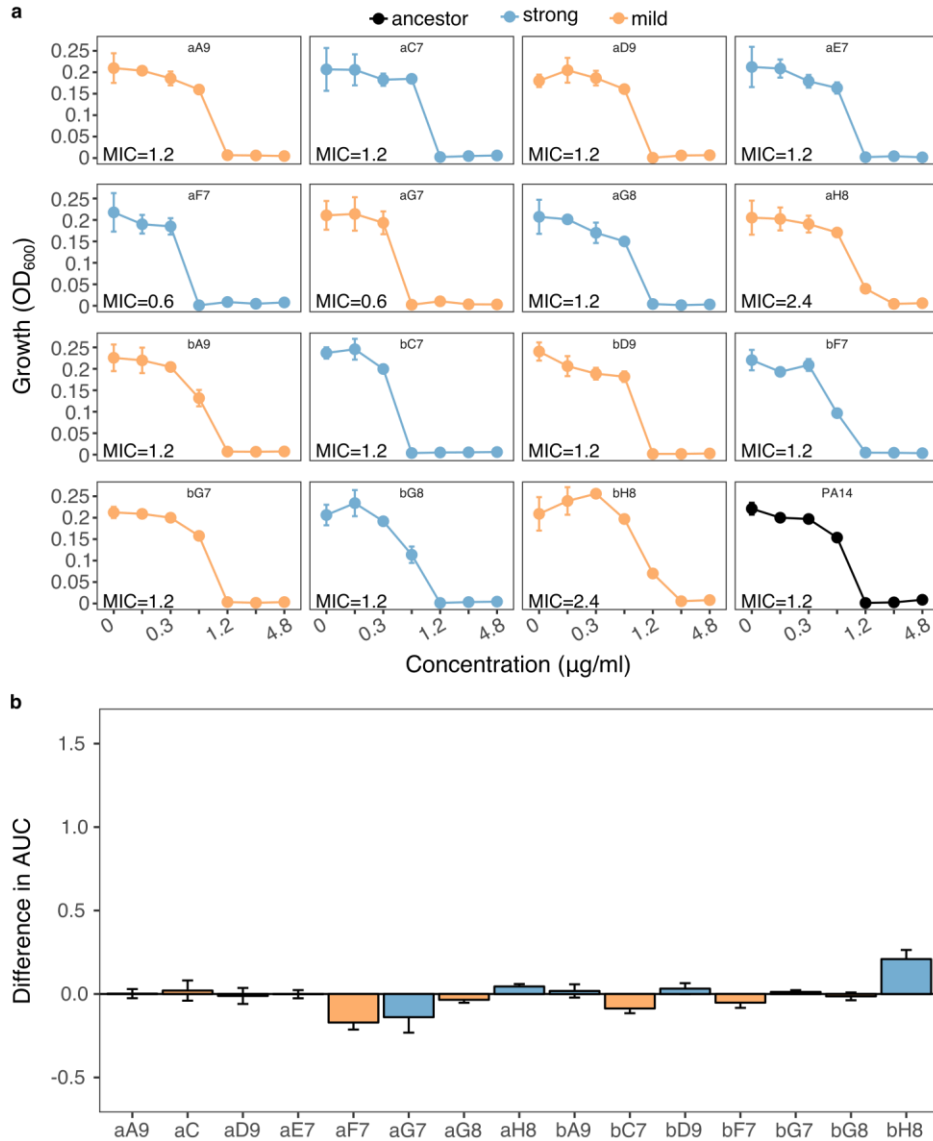

**Supplementary Figure 1. Re-sensitization to gentamicin (GEN) upon adaptation to carbenicillin (CAR).** We calculated **a**, dose-response relationships against GEN of 15 populations adapted to strong ( $n=7$ , light blue) and mild ( $n=8$ , light orange) drug increases compared to the PA14 ancestor (black, bottom-right panel). Mean  $\pm$  CI95,  $n = 3$  technical replicates. In most cases, the evolved population had the same MIC as PA14. Two populations (aF7 and aG7) showed lower MICs than PA14, while two (aH8 and bH8) showed slightly higher ones. The labels within each graph correspond to the code used during experimental evolution. Data from Source Data 4 **b**, Difference in the area under the curve (AUC) between each evaluated population and the PA14 ancestor. Scaling of the y-axis is equivalent to Fig. 3d. None of the populations was significantly different from the ancestor (Wilcoxon's test,  $n=3$ , adjusted  $P$  values min  $> 0.4$ , and max  $< 0.9$ ). Data from Source Data 5

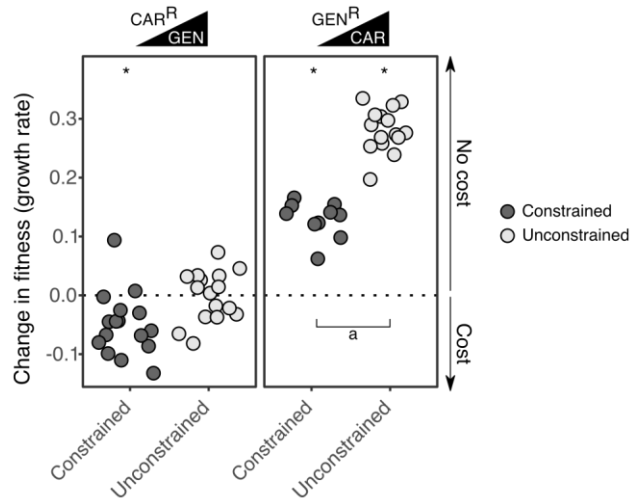

**Supplementary Figure 2. Changes in fitness after experimental evolution.** We calculated changes in fitness of the evolved  $CAR^R$  (left panel) and  $GEN^R$ -populations (right panel) relative to the maximum growth rate of the starting resistant populations (obtained from ref. 8 in the main text). Populations were grouped by whether adaptation was constrained (dark grey) or not (light grey) by the presence of the drug the populations were originally resistant to. Asterisks indicate significant increases or decreases in fitness (One-sample t-test,  $\mu=0$ ,  $P < 0.002$ ). Number of populations per group and experiment vary due to extinction (min=10, max=16). We found significant differences (indicated by the letter a) between constrained and unconstrained treatments in both directions (Two-sample t-test,  $P < 0.0085$ ). Data from Source Data 7.

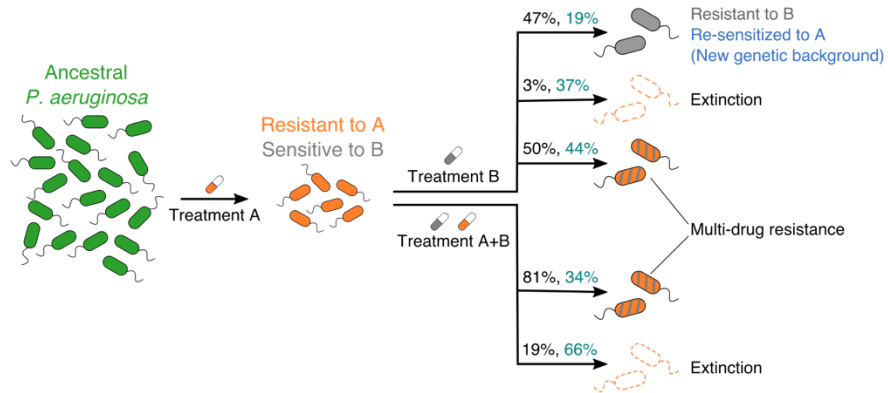

**Supplementary Figure 3. Collateral sensitivity and its evolutionary stability upon antibiotic switches.** As *P. aeruginosa* evolves collateral sensitivity after adaptation to one drug (here labeled Treatment A), the subsequent use of other antibiotics (Treatment B, or Treatment A+B) can have several evolutionary outcomes. As now shown by us, the hypersensitive population can evolve resistance to the second drug without modifying the mechanism conferring resistance to the first one, thereby causing multidrug resistance. If the mutations required to escape the sensitivity trade-off are incompatible with the present resistance mechanism, exposure to the second drug could lead to extinction. Alternatively, pleiotropic effects can lead to a situation in which *P. aeruginosa* becomes re-sensitized to the first drug but evolves resistance to the second one. If the second drug is added to the first drug (constrained treatments A+B), then this increases the likelihood of eradicating the bacterial population, but may also come at the risk of multidrug resistance evolution. The percentage of cases from our experiments resulting in each of the described scenarios is shown on top of each arrow. The percentages in black indicate the outcomes for the CAR/GEN experiments, and in cyan those observed for the PIT/STR experiments. A total of 32 replicates is accounted for each possible treatment (with B alone, or with A+B).



**Supplementary Table 1. Antibiotic concentrations for evolution experiment.**

| Previously evolved resistant population | New antibiotic                  |                              |                                | For maintenance of original resistance <sup>c</sup> |
|-----------------------------------------|---------------------------------|------------------------------|--------------------------------|-----------------------------------------------------|
|                                         | First dose (~IC <sub>50</sub> ) | Final dose mild <sup>a</sup> | Final dose strong <sup>b</sup> |                                                     |
| CAR-10                                  | 410 ng/ml<br>GEN                | 570 ng/ml<br>GEN             | 890 ng/ml<br>GEN               | +87 µg/ml<br>CAR                                    |
| GEN-4                                   | 1.0 µg/ml<br>CAR                | 30 µg/ml<br>CAR              | 87 µg/ml<br>CAR                | +890 ng/ml<br>GEN                                   |
| PIT-1                                   | 2.2 µg/ml<br>STR                | 8.5 µg/ml<br>STR             | 21 µg/ml<br>STR                | +4 µg/ml<br>PIT                                     |
| STR-2                                   | 0.68 µg/ml<br>PIT               | 1.8 µg/ml<br>PIT             | 4 µg/ml<br>PIT                 | +21 µg/ml<br>STR                                    |

<sup>a</sup> Approx. >IC<sub>95</sub> of hypersensitive population specified in column 1

<sup>b</sup> Approx. >IC<sub>95</sub> of wildtype PA14

<sup>c</sup> Added to treatment groups mild+constrained, slow+constrained

**Supplementary Table 2. Evaluation of the effect of the pace of drug increase (mild or strong) and evolutionary constraint (constrained or unconstrained) on cumulative relative growth<sup>a</sup>.**

| <b>Antibiotic</b> | <b>Variable</b> | <b><math>\chi^2</math></b> | <b>Adjusted <i>P</i></b> |
|-------------------|-----------------|----------------------------|--------------------------|
| GEN               | Pace            | 14.7                       | 0.0002                   |
|                   | Constraint      | 158.1                      | <0.0001                  |
| CAR               | Pace            | 18.1                       | <0.0001                  |
|                   | Constraint      | 53.8                       | <0.0001                  |

<sup>a</sup> Separate GLMs were performed for each antibiotic used during experimental evolution with the cumulative relative growth of surviving populations as the response variable, and pace of drug concentration increase (strong or mild) and constraint (constrained or unconstrained) as explanatory fixed factors. Starting clonal population was considered as a nested random factor. We used a type-II Wald  $\chi^2$ -test to evaluate the effect of these variables. We used the false discovery rate to adjust the *P* values for multiple comparisons.

**Supplementary Table 3. Evaluation of the changes in resistance<sup>a</sup>.**

| <b>Resistant to</b> | <b>Challenged with</b> | <b>Treatment</b>   | <b>Number of populations</b> | <b>Adjusted <i>P</i></b> |
|---------------------|------------------------|--------------------|------------------------------|--------------------------|
| CAR                 | CAR                    | No drug            | 8                            | 0.94485                  |
| CAR                 | CAR                    | Strong             | 8                            | 0.7736                   |
| CAR                 | CAR                    | Strong+constrained | 8                            | 0.96151                  |
| CAR                 | CAR                    | Mild               | 8                            | 0.6425                   |
| CAR                 | CAR                    | Mild+bound         | 8                            | 0.29516                  |
| CAR                 | GEN                    | No drug            | 8                            | 0.72291                  |
| CAR                 | GEN                    | Strong             | 8                            | 0.00013                  |
| CAR                 | GEN                    | Strong+constrained | 8                            | 0.00489                  |
| CAR                 | GEN                    | Mild               | 8                            | 0.00124                  |
| CAR                 | GEN                    | Mild+constrained   | 8                            | 0.0016                   |
| GEN                 | CAR                    | No drug            | 8                            | <0.00001                 |
| GEN                 | CAR                    | Strong             | 7                            | <0.00001                 |
| GEN                 | CAR                    | Strong+constrained | 2                            | 0.10237                  |
| GEN                 | CAR                    | Mild               | 8                            | <0.00001                 |
| GEN                 | CAR                    | Mild+constrained   | 8                            | <0.00001                 |
| GEN                 | GEN                    | No drug            | 8                            | 0.03872                  |
| GEN                 | GEN                    | Strong             | 7                            | 0.00065                  |
| GEN                 | GEN                    | Strong+constrained | 2                            | 0.61634                  |
| GEN                 | GEN                    | Mild               | 8                            | <0.00001                 |
| GEN                 | GEN                    | Mild+constrained   | 8                            | 0.00102                  |

<sup>a</sup> *P* values were obtained from a series of Student's t-tests per treatment for populations with ancestral resistance against a given antibiotic and evaluated against two drugs. We used the false discovery rate correction method to adjust *P* values for multiple comparisons.

**Supplementary Table 4. Changes in resistance between constrained and unconstrained adapted populations in the GEN/CAR experiment<sup>a</sup>.**

| <b>Resistant to</b> | <b>Challenged with</b> | <b>Adjusted <i>P</i></b> |
|---------------------|------------------------|--------------------------|
| CAR                 | CAR                    | 0.8156                   |
|                     | GEN                    | 0.5694                   |
| GEN                 | CAR                    | 0.0007                   |
|                     | GEN                    | <0.0001                  |

<sup>a</sup> *P* values were obtained from a series of two-sample Student's t-tests per treatment for populations adapted to constrained *versus* unconstrained environments. We used the false discovery rate correction method to adjust *P* values for multiple comparisons.

### **Source Data 1 (separate file)**

Source data for Figure 1b and 1c. Mean optical density and CI95 values obtained after 12 hours of growth in minimal media and different antibiotics. The populations tested here include the PA14 wt, and four resistant populations described in Barbosa et al., 2017. Each value is the average of 8 technical replicates per bacterial population.

### **Source Data 2 (separate file)**

Source data for Figure 2. Count data of extinction events. Extinct populations were determined by their inability to grow in rich media after 24 hours of incubation at 37°C.

### **Source Data 3 (separate file)**

Source data for Figure 3a and 3b. Evolutionary dynamics summarized by the area under the curve (AUC) relative to the treatment with no drugs for the evolution experiments CAR<sup>R</sup>->GEN and GEN<sup>R</sup>->CAR.

### **Source Data 4 (separate file)**

Source data for Supplementary Figure S1a. Growth characteristics measured by optical density under various drug concentrations for the populations adapted to unconstrained environments (strong and mild), as well as the PA14 wt against gentamicin. Each population-drug concentration was evaluated in triplicate.

### **Source Data 5 (separate file)**

Source data for Supplementary Figure S1b. Change in resistance of populations adapted to unconstrained environments (strong and mild) relative to the PA14 wt against

gentamicin. This was inferred by calculating the difference between the evolved populations and the PA14 wt in the area under the curve across drug concentrations.

**Source Data 6 (separate file)**

Source Data for Figure 3c, 3d, 3e, and 3f. Dose-response curves data of surviving populations and the respective ancestors challenged with carbenicillin or gentamicin. Optical density values were recorded after 12 hours of incubation at 37°C.

**Source Data 7 (separate file)**

Source Data for Figure 3e, 3f, and Supplementary Figure S2. Growth rate estimates of the surviving populations and the respective ancestors challenged with carbenicillin or gentamicin. Growth rate was calculated as indicated in the Methods section.

**Data Source 8 (separate file)**

Source Data for Figure 4a and 4b. Genetic changes compared to *Pseudomonas aeruginosa* PA14 wt strain as determined by whole-genome resequencing (Illumina MiSeq2x150bp PE, Nextera libraries). Isolates are coded with AA-BB-CC-: AA, antibiotic to which they are originally resistant; BB, antibiotic to which the clone shows collateral sensitivity; CC, well in the plate during experimental evolution.

**Data Source 9 (separate file)**

Source Data for Figure 4c and 4d. Estimated MIC values for several constructed mutants against carbenicillin and gentamicin.
